# Supplementary material for: Highly efficient regio and diastereoselective synthesis of functionalized bis-spirooxindoles and their antibacterial properties
Source: Royal Society of Chemistry journal article supplement (doi:10.1039/c6ra00613b), 2016-01-01
Supplement: c6ra00613b1.pdf [file c6ra00613b1.pdf]

## Electronic supporting information

### Highly efficient regio and diastereoselective synthesis of functionalized bis-spirooxindoles and their antibacterial properties

*Pambala Ramesh,<sup>a</sup> Kadiyala Srinivasa Rao,<sup>a</sup> Rajiv Trivedi,<sup>a,\*</sup> B. Sudheer Kumar,<sup>b</sup> R. S. Prakasham<sup>b</sup> and B. Sreedhar,<sup>c</sup>*

---

<sup>a</sup> Inorganic and Physical Chemistry Division, CSIR-Indian Institute of Chemical Technology, Hyderabad 500007, India

<sup>b</sup> Bio Engineering and Environmental Centre, CSIR-Indian Institute of Chemical Technology, Hyderabad 500007, India

<sup>c</sup> Laboratory of X-ray Crystallography.

CSIR-Indian Institute of Chemical Technology, Hyderabad-500007 (India)

Fax: ++91-40-27193275, E-mail: [rtrajiv401@gmail.com](mailto:rtrajiv401@gmail.com).

### Contents

|                                                         |         |
|---------------------------------------------------------|---------|
| General procedure                                       | S2      |
| Spectral data of all compounds                          | S3- S14 |
| <sup>1</sup> H NMR and <sup>13</sup> C of all compounds | S15-S34 |
| Crystal data and Tables for <b>4s</b>                   | S35-S51 |

## Experimental Section:

**General information:** Benzylamine, Isatins, Acetophenone, Ceric ammonium nitrate and all solvents were purchased from Sigma Aldrich and Alfa Aesar company and used without further purification as received. All  $^1\text{H}$  and  $^{13}\text{C}$  NMR spectra were recorded in deuterated chloroform ( $\text{CDCl}_3$ ) or  $\text{CDCl}_3+\text{DMSO}-d_6$  (deuterated dimethyl sulfoxide) (6:4) on Avance 300 or Avance 400 or Avance 500 spectrometers. Chemical shifts ( $\delta$ ) are reported in parts per million (ppm) relative to residual  $\text{CHCl}_3$  ( $^1\text{H}$ :  $\delta$  7.26 ppm,  $^{13}\text{C}$ :  $\delta$  77.00 ppm) as an internal reference. Coupling constants (J) are reported in Hertz (Hz). Peak multiplicity is indicated as follows: s-singlet, d-doublet, t-triplet, q-quartet, m-multiplet and dd-doublet of doublet. Melting points were measured on a BUCHI melting point machine. IR spectra were recorded on Thermo Nicolet FT/IR-5700 spectrometer. Mass spectra were recorded using Waters mass spectrometer. High resolution mass spectrums (HRMS) were recorded using Applied Bio-Sciences HRMS spectrometer at national center for mass spectroscopy-IICT.

## General Procedure for preparation for synthesis of (3a-31):

A 5 ml RB flask containing Isatin (**1**) (1.0 mmol), Benzylamine (**2**) (1.0 mmol), Isatin chalcone (**3**) (1.0 mmol), Ceric ammonium nitrate (0.5 mol%) and water (2 mL) was placed in oil bath and refluxed for the appropriate time, at 100 °C (temperature monitored by a thermometer). The progress of reaction was monitored by TLC. After the reaction was completed, the aqueous mixture was extracted with ethyl acetate and dried over  $\text{Na}_2\text{SO}_4$ , and the solvent was removed under reduced pressure. The reaction mixture was purified by (silica gel) column chromatography (hexane/AcOEt, 80:20 as eluent) to give pure products.

### Spectral data of all compounds:

#### Compound **4a**:-

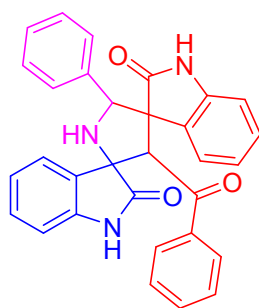

Colorless solid; Mp 248-250 °C; IR:  $\nu_{\max}$  3655, 3374, 3295, 3163, 3033, 2897, 2855, 1706, 1620, 1473, 1448, 1345, 1294, 1191, 1106, 1023, 970, 759, 696  $\text{cm}^{-1}$ ;  $^1\text{H}$  NMR (300 MHz,  $\text{CDCl}_3+\text{DMSO-d}_6$ ):  $\delta$  10.02 (s, 1H), 9.70 (s, 1H), 7.74 - 7.81 (m, 1H), 7.67 (d,  $J = 7.4$  Hz, 1H), 7.56 (s, 1H), 7.17 - 7.34 (m, 4H), 7.00 - 7.17 (m, 6H), 6.84 - 7.00 (m, 5H), 6.31 - 6.39 (m, 1H), 5.81 (d,  $J = 9.1$  Hz, 1H), 5.04 (s, 1H);  $^{13}\text{C}$  NMR (75 MHz,  $\text{CDCl}_3+\text{DMSO-d}_6$ ):  $\delta$  196.3, 179.7, 179.6, 142.2, 140.7, 136.3, 136.1, 128.8, 128.7, 128.5, 127.3, 127.2, 127.0, 126.8, 126.4, 125.8, 125.0, 122.7, 121.6, 121.1, 109.2, 108.3, 70.5, 67.6, 66.2, 61.3;  $m/z$  (ESI): 486  $[\text{M}+\text{H}]^+$ ; HRMS calcd for  $\text{C}_{31}\text{H}_{24}\text{O}_3\text{N}_3$ : 486.18122, found: 486.18159.

#### Compound **4b**:-

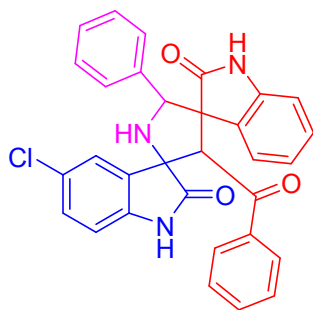

White solid; Mp 273-275 °C; IR:  $\nu_{\max}$  3384, 3319, 1719, 1675, 1618, 1476, 1443, 1342, 1292, 1255, 1186, 1122, 1063, 819, 755, 695, 566  $\text{cm}^{-1}$ ;  $^1\text{H}$  NMR (300 MHz,  $\text{CDCl}_3+\text{DMSO}-d_6$ ):  $\delta$  10.01 (s, 1H), 9.54 (s, 1H), 7.76 (d,  $J = 5.84$  Hz, 1H), 7.68 (s, 1H), 7.46 (s, 1H), 7.18 - 7.36 (m, 4H), 7.03-7.18 (m, 5H), 6.82 - 7.03 (m, 5H), 6.35 (d,  $J = 6.23$  Hz, 1H), 5.81 (d,  $J = 6.98$  Hz, 1H), 5.01(s, 1H);  $^{13}\text{C}$  NMR (75 MHz,  $\text{CDCl}_3+\text{DMSO}-d_6$ ):  $\delta$  196.4, 179.9, 179.6, 141.0, 140.8, 136.4, 136.2, 131.9, 130.7, 129.0, 128.5, 127.7, 127.4, 127.2, 127.1, 126.7, 126.4, 126.1, 125.2, 123.6, 121.9, 110.6, 108.5, 70.5, 67.7, 66.4, 61.2, 57.0; m/z (ESI): 520  $[\text{M}+\text{H}]^+$ ; HRMS calcd for  $\text{C}_{31}\text{H}_{23}\text{O}_3\text{N}_3\text{Cl}$ : 520.14225, found: 520.14330.

**Compound 4c:-**

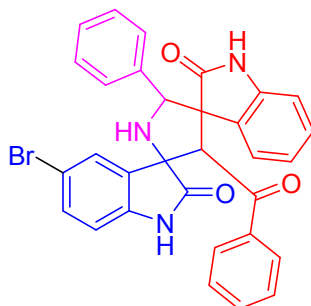

White solid; Mp 228-230 °C; IR:  $\nu_{\max}$  3655, 3392, 3323, 2960, 2890, 1713, 1679, 1616, 1475, 1442, 1345, 1295, 1256, 1220, 1189, 1157, 1127, 1080, 836, 755, 690, 560  $\text{cm}^{-1}$ ;  $^1\text{H}$  NMR (300 MHz  $\text{CDCl}_3+\text{DMSO}-d_6$ ):  $\delta$  10.01 (s, 1H), 9.62 (s, 1H), 7.68 - 7.87 (m, 2H), 7.48 (s, 1H), 7.19 - 7.38 (m, 4H), 7.04 - 7.19 (m, 5H), 6.95 - 7.04 (m, 2H), 6.81 - 6.95 (m, 3H), 6.30 - 6.39 (m, 1H), 5.80 (d,  $J = 6.98$  Hz, 1H), 5.01 (s, 1H);  $^{13}\text{C}$  NMR (75 MHz,  $\text{CDCl}_3+\text{DMSO}-d_6$ ):  $\delta$  195.7, 179.0, 178.8, 141.2, 140.4, 135.8, 135.7, 131.2, 131.0, 130.7, 128.0, 127.0, 126.8, 126.5, 126.0, 125.5, 124.4, 121.0, 112.5, 110.3, 107.8, 69.8, 66.9, 65.6, 60.4, 55.9; m/z (ESI): 564  $[\text{M}+\text{H}]^+$ ; HRMS calcd for  $\text{C}_{31}\text{H}_{25}\text{O}_3\text{N}_3\text{Br}$ : 566.0925, found: 566.09163.

**Compound 4d:-**

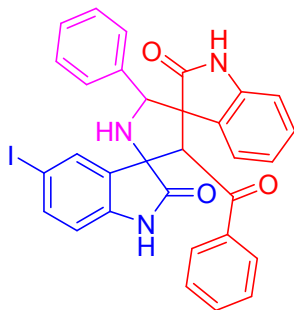

White solid; Mp 248-250 °C; IR:  $\nu_{\max}$  3357, 3316, 3060, 2891, 1719, 1675, 1615, 1473, 1390, 1340, 1301, 1252, 1185, 1126, 995, 809, 752, 692, 593, 529  $\text{cm}^{-1}$ ;  $^1\text{H}$  NMR (300 MHz,  $\text{CDCl}_3+\text{DMSO-d}_6$ ):  $\delta$  10.19 (s, 1H), 9.72 (s, 1H), 7.93 (d,  $J = 7.51$  Hz, 1H), 7.71 - 7.78 (m, 1H), 7.50 - 7.60 (m, 2H), 7.19 - 7.34 (m, 3H), 7.03 - 7.19 (m, 5H), 6.83 - 7.03 (m, 4H), 6.72 - 6.78 (m, 1H), 6.31 - 6.37 (m, 1H), 5.79 (d,  $J = 8.12$  Hz, 1H), 4.98 (s, 1H);  $^{13}\text{C}$  NMR (75 MHz,  $\text{CDCl}_3+\text{DMSO-d}_6$ ):  $\delta$  195.8, 178.9, 178.8, 141.9, 140.4, 137.1, 135.9, 135.8, 131.3, 131.1, 128.0, 127.0, 126.8, 126.6, 126.1, 125.6, 124.5, 121.1, 111.0, 107.9, 82.5, 69.8, 66.8, 65.7, 60.5;  $m/z$  (ESI): 612  $[\text{M}+\text{H}]^+$ ; HRMS calcd for  $\text{C}_{31}\text{H}_{23}\text{O}_3\text{N}_3\text{I}$ : 612.07786, found: 612.08023.

#### Compound 4e:-

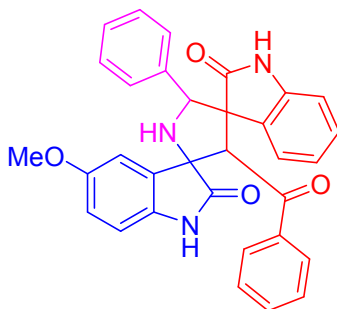

White solid; Mp 219-220 °C; IR:  $\nu_{\max}$  3405, 3296, 3276, 3060, 2999, 2970, 2913, 2833, 1720, 1697, 1619, 1489, 1451, 1410, 1356, 1301, 1261, 1188, 1130, 1066, 1032, 989, 868, 817, 775, 747, 695, 678, 658, 616, 574, 533, 509  $\text{cm}^{-1}$ ;  $^1\text{H}$  NMR (300 MHz,  $\text{CDCl}_3+\text{DMSO-d}_6$ ):  $\delta$  9.82 (s, 1H), 9.67 (s, 1H), 7.71 - 7.86 (m, 1H), 7.71 - 7.64 (m, 5H), 7.02 - 7.17 (m, 5H), 6.94 - 7.03 (m, 2H), 6.81 - 6.94 (m, 3H), 6.74 - 6.82 (m, 1H), 6.30 - 6.39 (m, 1H), 5.83 (d,  $J = 3.7$  Hz, 1H), 5.01 (s, 1H), 3.82 (s, 3H);  $^{13}\text{C}$  NMR (75 MHz,  $\text{CDCl}_3+\text{DMSO-d}_6$ ):  $\delta$  196.2, 179.7, 179.5, 154.7, 140.6, 136.3, 136.1, 135.5, 131.5, 129.9, 128.5, 127.3, 127.1, 126.9, 126.7, 126.4, 125.8, 125.0, 121.5, 113.5, 109.9, 109.6, 108.2, 70.4, 67.9, 66.2, 61.1, 55.2;  $m/z$  (ESI): 517  $[\text{M}+\text{H}]^+$ .

Compound **4f**:-

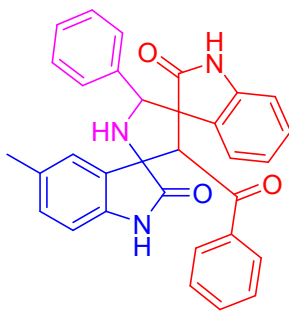

White solid; Mp 238-240 °C; IR:  $\nu_{\max}$  3510, 3388, 3324, 3058, 2890, 1713, 1674, 1618, 1494, 1471, 1448, 1388, 1342, 1301, 1249, 1192, 1160, 1119, 1029, 993, 821, 795, 755, 686, 595, 587  $\text{cm}^{-1}$ ;  $^1\text{H}$  NMR (300 MHz,  $\text{CDCl}_3+\text{DMSO-d}_6$ ):  $\delta$  9.93 (s, 1H), 9.77 (s, 1H), 7.73 - 7.81 (m, 1H), 7.60 (s, 1H), 7.47 (s, 1H), 7.26 - 7.32 (m, 2H), 7.18 - 7.32 (m, 1H), 7.01 - 7.17 (m, 6H), 6.79 - 7.00 (m, 5H), 6.31 - 6.37 (m 1H), 5.80 (s, 1H), 5.02 (s, 1H), 2.36 (s, 3H);  $^{13}\text{C}$  NMR (75 MHz,  $\text{CDCl}_3+\text{DMSO-d}_6$ ):  $\delta$  196.2, 179.6, 140.6, 139.6, 136.3, 136.1, 131.4, 130.4, 129.1, 128.6, 128.5, 127.2, 127.1, 126.9, 126.7, 126.4, 125.7, 124.9, 123.2, 121.4, 108.8, 108.2, 70.4, 67.6, 66.1, 61.2, 20.2;  $m/z$  (ESI): 500  $[\text{M}+\text{H}]^+$ ; HRMS calcd for  $\text{C}_{32}\text{H}_{26}\text{O}_3\text{N}_3$ : 500.1952, found: 500.19732.

Compound **4g**:-

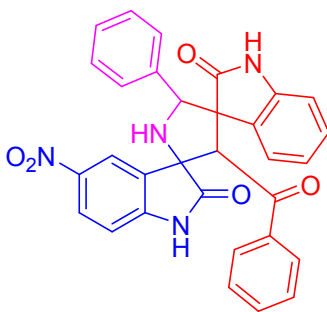

White solid; Mp 194-196 °C; IR:  $\nu_{\max}$  3646, 3337, 1731, 1675, 1624, 1521, 1478, 1451, 1403, 1341, 1243, 1182, 1103, 1025, 980, 906, 831, 755, 696, 598, 562, 458  $\text{cm}^{-1}$ ;  $^1\text{H}$  NMR (300 MHz,  $\text{CDCl}_3+\text{DMSO-d}_6$ ):  $\delta$  10.8 (s, 1H), 9.71(s, 1H), 8.55 (d,  $J = 2.07$  Hz, 1H), 8.19 - 8.24 (m, 1H), 7.70 - 7.76 (m, 1H), 7.52 (s, 1H), 7.20 - 7.34 (m, 3H), 6.97 - 7.20 (s, 8H), 6.83 - 6.97 (m, 2H), 6.32 - 6.39 (m, 1H), 5.79 (d,  $J = 6.23$  Hz, 1H), 5.09(s, 1H);  $^{13}\text{C}$  NMR (75 MHz,  $\text{CDCl}_3+\text{DMSO-d}_6$ ):  $\delta$  196.3, 180.1, 179.1, 148.9, 142.0, 140.8, 135.9, 136.0, 131.9, 129.7, 128.2, 127.6, 127.3,

127.0, 126.6, 126.0, 124.8, 121.6, 119.3, 109.0, 108.4, 70.3, 67.1, 66.4, 60.8; m/z (ESI): 531, [M+H]<sup>+</sup>; HRMS calcd for C<sub>31</sub>H<sub>23</sub>O<sub>5</sub>N<sub>4</sub>: 531.16630, found: 531.16778.

Compound **4h**:-

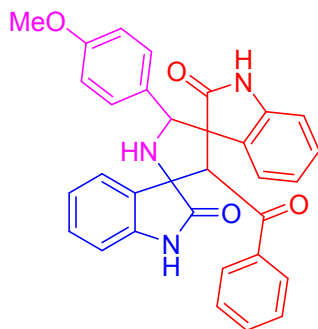

White solid; Mp 224-226 °C; IR:  $\nu_{\max}$  3318, 3181, 3083, 2952, 2839, 1707, 1617, 1511, 1472, 1349, 1293, 1248, 1190, 1112, 1024, 978, 835, 784, 751, 692, 568, 501 cm<sup>-1</sup>; <sup>1</sup>H NMR (300 MHz, CDCl<sub>3</sub>+DMSO-d<sub>6</sub>):  $\delta$  10.01 (s, 1H), 9.65 (s, 1H), 7.72 - 7.77 (m, 1H), 7.66 (d, *J* = 7.76 Hz, 1H), 7.57 (s, 1H), 7.17 - 7.32 (m, 4H), 7.00 - 7.12 (m, 3H), 6.82 - 6.96 (m, 5H), 6.65(d, *J* = 8.68 Hz, 2H), 6.32 - 6.37 (m, 1H), 5.74 (d, *J* = 9.06 Hz, 1H), 5.04 (s, 1H), 3.71 (s, 3H); <sup>13</sup>C NMR (75 MHz, CDCl<sub>3</sub>+DMSO-d<sub>6</sub>):  $\delta$  196.2, 179.7, 179.6, 158.1, 142.2, 140.6, 136.3, 131.5, 128.7, 128.5, 128.0, 127.2, 127.1, 126.9, 126.4, 124.8, 122.6, 121.4, 120.9, 112.2, 109.1, 108.1, 70.2, 67.5, 66.0, 61.3, 54.2; m/z (ESI): 516 [M+H]<sup>+</sup>; HRMS calcd for C<sub>32</sub>H<sub>26</sub>O<sub>4</sub>N<sub>3</sub>: 516.19178, found: 516.19232.

Compound **4i**:-

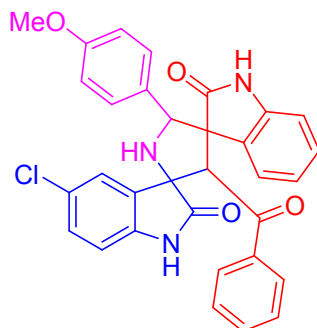

White solid; Mp 194-196 °C; IR:  $\nu_{\max}$  3650, 3177, 3066, 2840, 1727, 1697, 1618, 1516, 1477, 1449, 1351, 1292, 1253, 1185, 1129, 1062, 1021, 961, 877, 826, 751, 693, 627, 598, 567, 501 cm<sup>-1</sup>; <sup>1</sup>H NMR (300 MHz, CDCl<sub>3</sub>+DMSO-d<sub>6</sub>):  $\delta$  10.2 (s, 1H), 9.68 (s, 1H), 7.69 - 7.75 (m, 1H),

7.65 (d,  $J = 1.88$  Hz, 1H), 7.57 (s, 1H), 7.18 - 7.32 (m, 4H), 7.05 - 7.13 (m, 2H), 6.82 - 6.96 (m, 5H), 6.66 (d,  $J = 8.87$  Hz, 2H), 6.32 - 6.37 (m, 1H), 5.73 (d,  $J = 7.93$  Hz, 1H), 4.99 (s, 1H), 3.72 (s, 3H);  $^{13}\text{C}$  NMR (75 MHz,  $\text{CDCl}_3 + \text{DMSO-d}_6$ ):  $\delta$  195.5, 178.8, 178.5, 157.5, 135.5, 140.5, 140.2, 130.9, 127.8, 126.5, 125.7, 124.9, 124.1, 122.6, 120.6, 111.5, 109.5, 107.4, 69.4, 66.6, 65.2, 60.2, 53.6;  $m/z$  (ESI): 550  $[\text{M} + \text{H}]^+$ ; HRMS calcd for  $\text{C}_{32}\text{H}_{25}\text{O}_4\text{N}_3\text{Cl}$ : 550.15281, found: 550.15428.

Compound **4j**:-

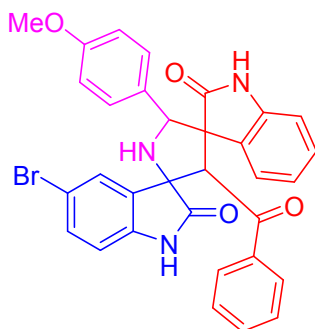

White solid; Mp 222-224 °C; IR:  $\nu_{\text{max}}$  3653, 3182, 2921, 1727, 1695, 1617, 1517, 1476, 1448, 1351, 1292, 1253, 1185, 1130, 1022, 959, 877, 826, 751, 687, 627, 570, 502  $\text{cm}^{-1}$ ;  $^1\text{H}$  NMR (300 MHz,  $\text{CDCl}_3 + \text{DMSO-d}_6$ ):  $\delta$  10.18 (s, 1H), 9.65 (s, 1H), 7.63 - 7.89 (m, 2H), 7.46 - 7.62 (m, 1H), 7.16 - 7.46 (m, 4H), 7.01 - 7.16 (m, 2H), 6.75 - 7.00 (m, 5H), 6.56 - 6.75 (m, 2H), 6.28 - 6.46 (m, 1H), 5.73 (d,  $J = 4.9$  Hz, 1H), 4.99 (s, 1H), 3.71 (s, 3H);  $^{13}\text{C}$  NMR (75 MHz,  $\text{CDCl}_3 + \text{DMSO-d}_6$ ):  $\delta$  196.1, 179.5, 179.4, 158.2, 141.4, 140.6, 136.1, 131.6, 131.5, 131.0, 128.3, 128.0, 127.3, 127.2, 127.1, 126.4, 125.9, 124.8, 121.4, 113.1, 112.2, 110.8, 108.2, 70.0, 67.3, 65.9, 60.9, 56.6, 54.2;  $m/z$  (ESI): 594  $[\text{M} + \text{H}]^+$ ; HRMS calcd for  $\text{C}_{32}\text{H}_{25}\text{O}_4\text{N}_3\text{Br}$ : 594.10230, found: 594.10464.

Compound **4k**:-

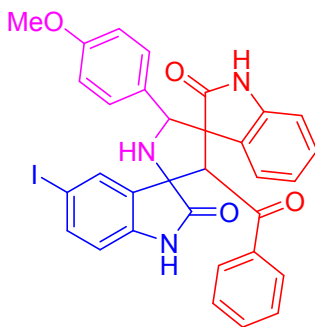



White solid; Mp 212-214 °C; IR:  $\nu_{\max}$  3655, 3438, 3192, 3064, 2839, 1726, 1693, 1615, 1516, 1475, 1449, 1350, 1291, 1250, 1185, 1131, 1022, 955, 880, 826, 751, 687, 628, 594, 531, 500, 457  $\text{cm}^{-1}$ ;  $^1\text{H}$  NMR (300 MHz,  $\text{CDCl}_3+\text{DMSO-d}_6$ ):  $\delta$  10.49 (s, 1H), 9.98 (s, 1H), 8.03 (s, 1H), 7.87 (s, 1H), 7.71 (d,  $J=6.98$  Hz, 1H), 7.50 - 7.57 (m, 1H), 7.20 - 7.31 (m, 3H), 7.05 - 7.18 (m, 2H), 6.79 - 6.97 (m, 4H), 6.70 - 6.78 (m, 1H), 6.61 - 6.70 (m, 2H), 6.31 (d,  $J = 7.17$  Hz, 1H), 5.62 (d,  $J = 6.60$  Hz, 1H), 4.93 (s, 1H), 3.68 (s, 3H);  $^{13}\text{C}$  NMR (75 MHz,  $\text{CDCl}_3+\text{DMSO-d}_6$ ):  $\delta$  196.5, 179.8, 179.7, 158.6, 142.1, 140.7, 137.9, 136.4, 132.0, 131.9, 131.6, 128.7, 128.3, 127.7, 127.5, 127.4, 126.8, 125.2, 122.0, 112.6, 111.7, 108.5, 83.5, 70.3, 67.5, 66.3, 61.3, 57.2, 54.6;  $m/z$  (ESI): 642  $[\text{M}+\text{H}]^+$ ; HRMS calcd for  $\text{C}_{32}\text{H}_{25}\text{O}_4\text{N}_3\text{I}$ : 642.08843, found: 642.09099.

Compound **4l**:-

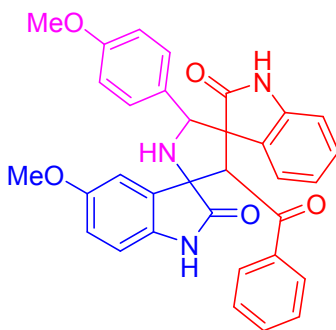

White solid; Mp 190-192 °C; IR:  $\nu_{\max}$  3393, 3265, 3062, 2933, 2837, 1701, 1614, 1492, 1444, 1347, 1296, 1251, 1186, 1131, 1072, 1027, 832, 750, 692, 621, 571, 501  $\text{cm}^{-1}$ ;  $^1\text{H}$  NMR (300 MHz,  $\text{CDCl}_3+\text{DMSO-d}_6$ ):  $\delta$  10.1 (s, 1H), 9.86 (s, 1H), 7.63 - 7.95 (m, 2H), 7.17 - 7.34 (m, 4H), 7.00 - 7.17 (m, 2H), 6.73 - 7.00 (m, 6H), 6.58 - 6.72 (m, 2H), 6.27 - 6.38 (m, 1H), 5.62 - 5.75 (m, 1H), 4.96 (s, 1H), 3.82 (s, 3H), 3.71 (s, 3H);  $^{13}\text{C}$  NMR (75 MHz,  $\text{CDCl}_3+\text{DMSO-d}_6$ ):  $\delta$  196.2, 179.7, 179.6, 158.2, 154.8, 140.6, 136.4, 135.5, 131.5, 130.0, 128.6, 128.1, 127.3, 127.2, 127.1, 126.5, 125.0, 121.5, 113.6, 112.3, 109.9, 109.6, 108.2, 70.3, 67.9, 66.1, 61.3, 55.3, 54.3;  $m/z$  (ESI): 546  $[\text{M}+\text{H}]^+$ ; HRMS calcd for  $\text{C}_{33}\text{H}_{28}\text{O}_5\text{N}_3$ : 546.20235, found: 546.20339.

Compound **4m**:-

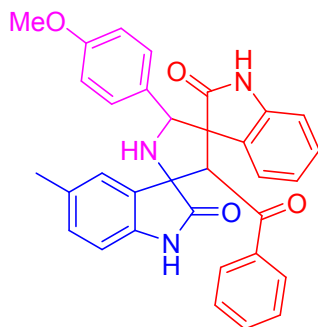

White solid; Mp 194-196 °C; IR:  $\nu_{\max}$  3307, 3200, 2964, 1710, 1683, 1617, 1509, 1476, 1344, 1298, 1247, 1196, 1169, 1111, 1028, 814, 781, 751, 672, 627, 600, 563, 501, 451  $\text{cm}^{-1}$ ;  $^1\text{H}$  NMR (300 MHz,  $\text{CDCl}_3+\text{DMSO-d}_6$ ):  $\delta$  9.84 (s, 1H), 9.65 (s, 1H), 7.75 (d,  $J = 6.23$  Hz, 1H), 7.55 (s, 1H), 7.48 (s, 1H), 7.15 - 7.34 (m, 3H), 6.98 - 7.15 (m, 3H), 6.77 - 6.96 (m, 5H), 6.58 - 6.72 (m, 2H), 6.28 - 6.40 (m, 1H), 5.75 (d,  $J = 8.12$  Hz, 1H), 5.02 (s, 1H), 3.70 (s, 3H), 2.36 (s, 3H);  $^{13}\text{C}$  NMR (75 MHz,  $\text{CDCl}_3+\text{DMSO-d}_6$ ):  $\delta$  196.3, 179.8, 158.2, 140.6, 140.5, 139.7, 139.6, 136.4, 131.5, 130.5, 129.2, 128.7, 128.6, 128.1, 127.3, 127.2, 127.0, 126.5, 125.0, 123.4, 121.6, 112.3, 109.0, 108.2, 70.3, 67.6, 66.0, 61.4, 54.4, 20.3;  $m/z$  (ESI): 530  $[\text{M}+\text{H}]^+$ ; HRMS calcd for  $\text{C}_{33}\text{H}_{28}\text{O}_4\text{N}_3$ : 530.20743, found: 530.20830.

#### Compound **4n**:-

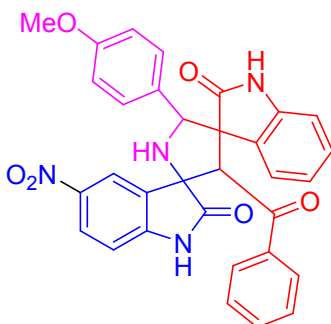

White solid; Mp 222-224 °C; IR:  $\nu_{\max}$  3650, 3423, 3199, 3071, 2845, 1735, 1698, 1620, 1518, 1468, 1410, 1337, 1298, 1249, 1183, 1098, 1022, 965, 905, 832, 751, 689, 627, 565, 507, 459  $\text{cm}^{-1}$ ;  $^1\text{H}$  NMR (300 MHz,  $\text{CDCl}_3+\text{DMSO-d}_6$ ):  $\delta$  11.05 (s, 1H), 9.92 (s, 1H), 8.50 (d,  $J = 1.88$  Hz, 1H), 8.15-8.24 (m, 1H), 7.85 (s, 1H), 7.70 (d,  $J = 6.98$  Hz, 1H), 7.19-7.33 (m, 3H), 7.00-7.18 (m, 3H), 6.78-7.00 (m, 4H), 6.62-6.74 (m, 2H), 6.29-6.37 (m, 1H), 5.67 (d,  $J = 6.60$  Hz, 1H), 5.06 (s, 1H), 3.71 (s, 3H);  $^{13}\text{C}$  NMR (75 MHz,  $\text{CDCl}_3+\text{DMSO-d}_6$ ):  $\delta$  196.4, 180.2, 179.2, 158.4, 148.9, 142.1, 140.7, 136.0, 131.9, 129.8, 128.3, 128.0, 127.5, 127.3, 126.6, 126.1, 124.8, 121.6, 119.3,

112.4, 109.0, 108.4, 70.2, 67.1, 66.3, 60.9, 56.8, 54.4, 49.2; m/z (ESI): 561 [M+H]<sup>+</sup>; HRMS calcd for C<sub>32</sub>H<sub>25</sub>O<sub>6</sub>N<sub>4</sub>: 561.17686, found: 561.17833.

Compound **4o**:-

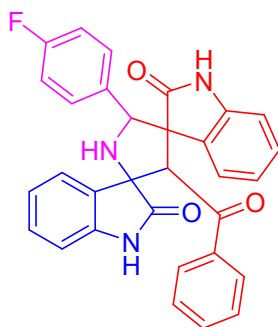

White solid; Mp 260-262 °C; IR:  $\nu_{\max}$  3527, 3368, 3327, 2891, 2825, 1715, 1675, 1618, 1509, 1476, 1448, 1396, 1335, 1290, 1224, 1187, 1108, 1023, 994, 960, 834, 798, 759, 680, 641, 594, 569, 545, 497 cm<sup>-1</sup>; <sup>1</sup>H NMR (300 MHz, CDCl<sub>3</sub>+DMSO-d<sub>6</sub>):  $\delta$  9.99 (s, 1H), 9.65 (s, 1H), 7.73 - 7.81 (m, 1H), 7.68 (d, *J* = 7.36 Hz, 1H), 7.51 - 7.61 (m, 1H), 7.18 - 7.33 (m, 4H), 6.75 - 7.15 (m, 10H), 6.31 - 6.39 (m, 1H), 5.79 (s, 1H), 5.05 (s, 1H); <sup>13</sup>C NMR (75 MHz, CDCl<sub>3</sub>+DMSO-d<sub>6</sub>):  $\delta$  196.1, 179.8, 179.3, 142.2, 140.6, 136.2, 132.1, 131.5, 128.8, 128.6, 128.2, 127.7, 127.6, 127.4, 127.1, 126.4, 124.9, 122.8, 121.5, 121.0, 113.8, 113.5, 109.1, 108.2, 69.7, 67.3, 65.7, 61.0; m/z (ESI): 504 [M+H]<sup>+</sup>; HRMS calcd for C<sub>31</sub>H<sub>23</sub>O<sub>3</sub>N<sub>3</sub>F: 504.17180, found: 504.17214.

Compound **4p**:-

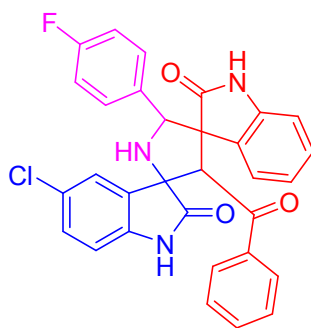

White solid; Mp 256-258 °C; IR:  $\nu_{\max}$  3657, 3388, 3324, 2891, 1717, 1679, 1619, 1507, 1477, 1442, 1392, 1344, 1296, 1255, 1221, 1188, 1158, 1122, 837, 757, 674, 594, 562 cm<sup>-1</sup>; <sup>1</sup>H NMR (300 MHz, CDCl<sub>3</sub>+DMSO-d<sub>6</sub>):  $\delta$  10.1 (s, 1H), 9.61 (s, 1H), 7.71 - 7.81 (m, 1H), 7.66 (d, *J* = 1.88 Hz, 1H), 7.49 (s, 1H), 7.16 - 7.33 (m, 4H), 6.96 - 7.15 (m, 4H), 6.76 - 6.96 (m, 5H), 6.28 - 6.40

(m, 1H), 5.78 (d,  $J = 7.17$  Hz, 1H), 5.01 (s, 1H);  $^{13}\text{C}$  NMR (75 MHz,  $\text{CDCl}_3+\text{DMSO}-d_6$ ):  $\delta$  195.7, 179.3, 178.7, 159.4, 140.7, 140.3, 135.8, 131.9, 131.3, 130.4, 128.2, 127.8, 127.5, 127.4, 127.1, 126.8, 126.1, 125.4, 124.5, 123.0, 121.1, 113.4, 131.1, 109.9, 107.9, 69.2, 66.9, 65.3, 60.3, 56.0;  $m/z$  (ESI): 538  $[\text{M}+\text{H}]^+$ ; HRMS calcd for  $\text{C}_{31}\text{H}_{22}\text{O}_3\text{N}_3\text{ClF}$ : 538.13282, found: 538.13416.

Compound **4q**:-

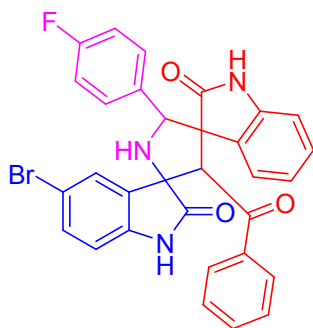

White solid; Mp 234-236 °C; IR:  $\nu_{\text{max}}$  3655, 3392, 3326, 2968, 2890, 1718, 1679, 1617, 1506, 1475, 1442, 1391, 1345, 1295, 1256, 1220, 1189, 1157, 1127, 1080, 1048, 1020, 971, 880, 836, 755, 729, 693, 623, 593, 563, 536, 454  $\text{cm}^{-1}$ ;  $^1\text{H}$  NMR (300 MHz,  $\text{CDCl}_3+\text{DMSO}-d_6$ ):  $\delta$  10.43 (s, 1H), 9.92 (s, 1H), 7.69 - 7.84 (m, 2H), 7.18 - 7.55 (m, 5H), 6.95 - 7.18 (m, 4H), 6.77 - 6.95 (m, 5H), 6.29 - 6.39 (m, 1H), 5.71 (d,  $J = 6.60$  Hz, 1H), 4.96 (s, 1H);  $^{13}\text{C}$  NMR (75 MHz,  $\text{CDCl}_3+\text{DMSO}-d_6$ ):  $\delta$  195.5, 179.0, 178.4, 141.1, 140.1, 135.5, 131.8, 131.1, 130.8, 130.6, 127.7, 127.3, 127.2, 126.9, 126.6, 125.8, 125.6, 124.3, 120.8, 113.1, 112.9, 112.3, 110.1, 107.6, 68.9, 66.6, 65.1, 60.1, 55.6;  $m/z$  (ESI): 582  $[\text{M}+\text{H}]^+$ ; HRMS calcd for  $\text{C}_{31}\text{H}_{22}\text{O}_3\text{N}_3\text{BrF}$ : 582.08231, found: 582.08426.

Compound **4r**:-

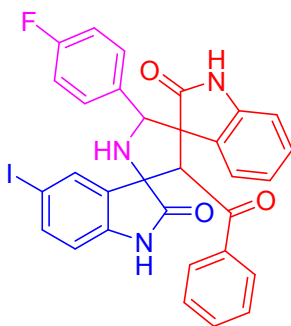

White solid; Mp 189-190 °C IR:  $\nu_{\max}$  3358, 2895, 1718, 1677, 1614, 1508, 1473, 1386, 1340, 1299, 1219, 1187, 1159, 1128, 1080, 1019, 995, 967, 835, 813, 751, 684, 595, 530, 491, 452  $\text{cm}^{-1}$ ;  $^1\text{H}$  NMR (300 MHz  $\text{CDCl}_3+\text{DMSO-}d_6$ ):  $\delta$  10.17 (s, 1H), 9.68 (s, 1H), 7.93 (d,  $J = 1.13$  Hz, 1H), 7.71 - 7.79 (m, 1H), 7.49 - 7.59 (m, 2H), 7.17 - 7.33 (m, 3H), 6.96 - 7.17 (m, 4H), 6.79 - 6.96 (m, 4H), 6.71 - 6.79 (m, 1H), 6.28 - 6.39 (m, 1H), 5.77 (d,  $J = 6.79$  Hz, 1H), 5.00 (s, 1H);  $^{13}\text{C}$  NMR (75 MHz,  $\text{CDCl}_3+\text{DMSO-}d_6$ ):  $\delta$  195.5, 178.6, 178.3, 141.6, 140.1, 136.6, 135.5, 131.8, 131.0, 127.6, 127.2, 127.1, 126.8, 126.5, 125.7, 124.2, 120.7, 113.1, 112.8, 110.6, 107.5, 82.2, 68.8, 66.3, 65.0, 60.0;  $m/z$  (ESI): 630  $[\text{M}+\text{H}]^+$ ; HRMS calcd for  $\text{C}_{31}\text{H}_{22}\text{O}_3\text{N}_3\text{F}$ : 630.0742, found: 630.07121.

#### Compound 4s:-

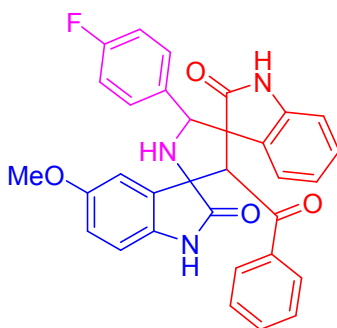

White solid; Mp 236-238 °C; IR:  $\nu_{\max}$  3297, 3176, 3052, 1721, 1709, 1683, 1603, 1489, 1471, 1443, 1386, 1359, 1307, 1265, 1239, 1212, 1162, 1107, 1068, 1027, 992, 934, 905, 845, 807, 748, 680, 662, 613, 584, 546, 499, 453  $\text{cm}^{-1}$ ;  $^1\text{H}$  NMR (300 MHz,  $\text{CDCl}_3+\text{DMSO-}d_6$ ):  $\delta$  10.1 (s, 1H), 9.87 (s, 1H), 7.77 - 7.81 (m, 1 H), 7.74 - 7.77 (d,  $J = 1.32$  Hz, 1H), 7.20 - 7.32 (m, 4H), 7.05 - 7.14 (m, 2H), 6.96 - 7.04 (m, 2H), 6.73 - 6.94 (m, 6H), 6.29 - 6.37 (m, 1H), 5.75 (d,  $J = 7.36$  Hz, 1H), 4.97 (s, 1H), 3.82 (s, 3H);  $^{13}\text{C}$  NMR (75 MHz,  $\text{CDCl}_3+\text{DMSO-}d_6$ ):  $\delta$  195.6, 179.3, 178.7, 154.1, 140.2, 135.8, 135.1, 131.8, 131.1, 129.5, 127.9, 127.3, 127.2, 126.9, 126.7, 125.9, 124.5, 120.9, 113.2, 113.0, 109.6, 109.0, 107.7, 69.2, 67.2, 65.2, 60.4, 54.6;  $m/z$  (ESI): 534  $[\text{M}+\text{H}]^+$ ; HRMS calcd for  $\text{C}_{32}\text{H}_{25}\text{O}_4\text{N}_3\text{F}$ : 534.18236, found: 534.18342.

#### Compound 4t:-

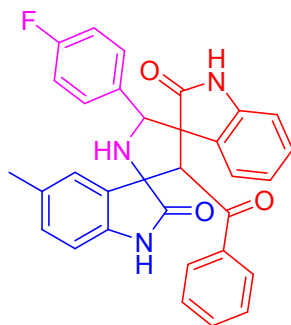

White solid; Mp 242-243 °C; IR:  $\nu_{\max}$  3382, 3325, 3214, 2893, 1713, 1678, 1620, 1502, 1387, 1342, 1300, 1222, 1195, 1160, 1114, 1022, 832, 757, 686, 598, 563  $\text{cm}^{-1}$ ;  $^1\text{H}$  NMR (300 MHz,  $\text{CDCl}_3+\text{DMSO-d}_6$ ):  $\delta$  9.79 (s, 1H), 9.64 (s, 1H), 7.73 - 7.84 (m, 1H), 7.43 - 7.58 (m, 2H), 7.17 - 7.35 (m, 3H), 6.95 - 7.15 (m, 5H), 6.76 - 6.95 (m, 5H), 6.29 - 6.41 (m, 1H), 5.80 (d,  $J = 7.93$  Hz, 1H), 5.03 (s, 1H), 2.36 (s, 3H);  $^{13}\text{C}$  NMR (75 MHz,  $\text{CDCl}_3+\text{DMSO-d}_6$ ):  $\delta$  195.6, 179.3, 178.8, 140.2, 139.3, 135.8, 131.8, 131.0, 129.7, 128.5, 128.3, 127.9, 127.2, 127.1, 126.9, 126.6, 125.9, 124.4, 123.0, 120.9, 113.2, 112.9, 108.3, 107.7, 69.1, 66.9, 65.2, 60.5, 19.8;  $m/z$  (ESI): 518  $[\text{M}+\text{H}]^+$ ; HRMS calcd for  $\text{C}_{32}\text{H}_{25}\text{O}_3\text{N}_3\text{F}$ : 518.18745, found: 518.18833.

# $^1\text{H}$ and $^{13}\text{C}$ NMR Spectra of compound 4a

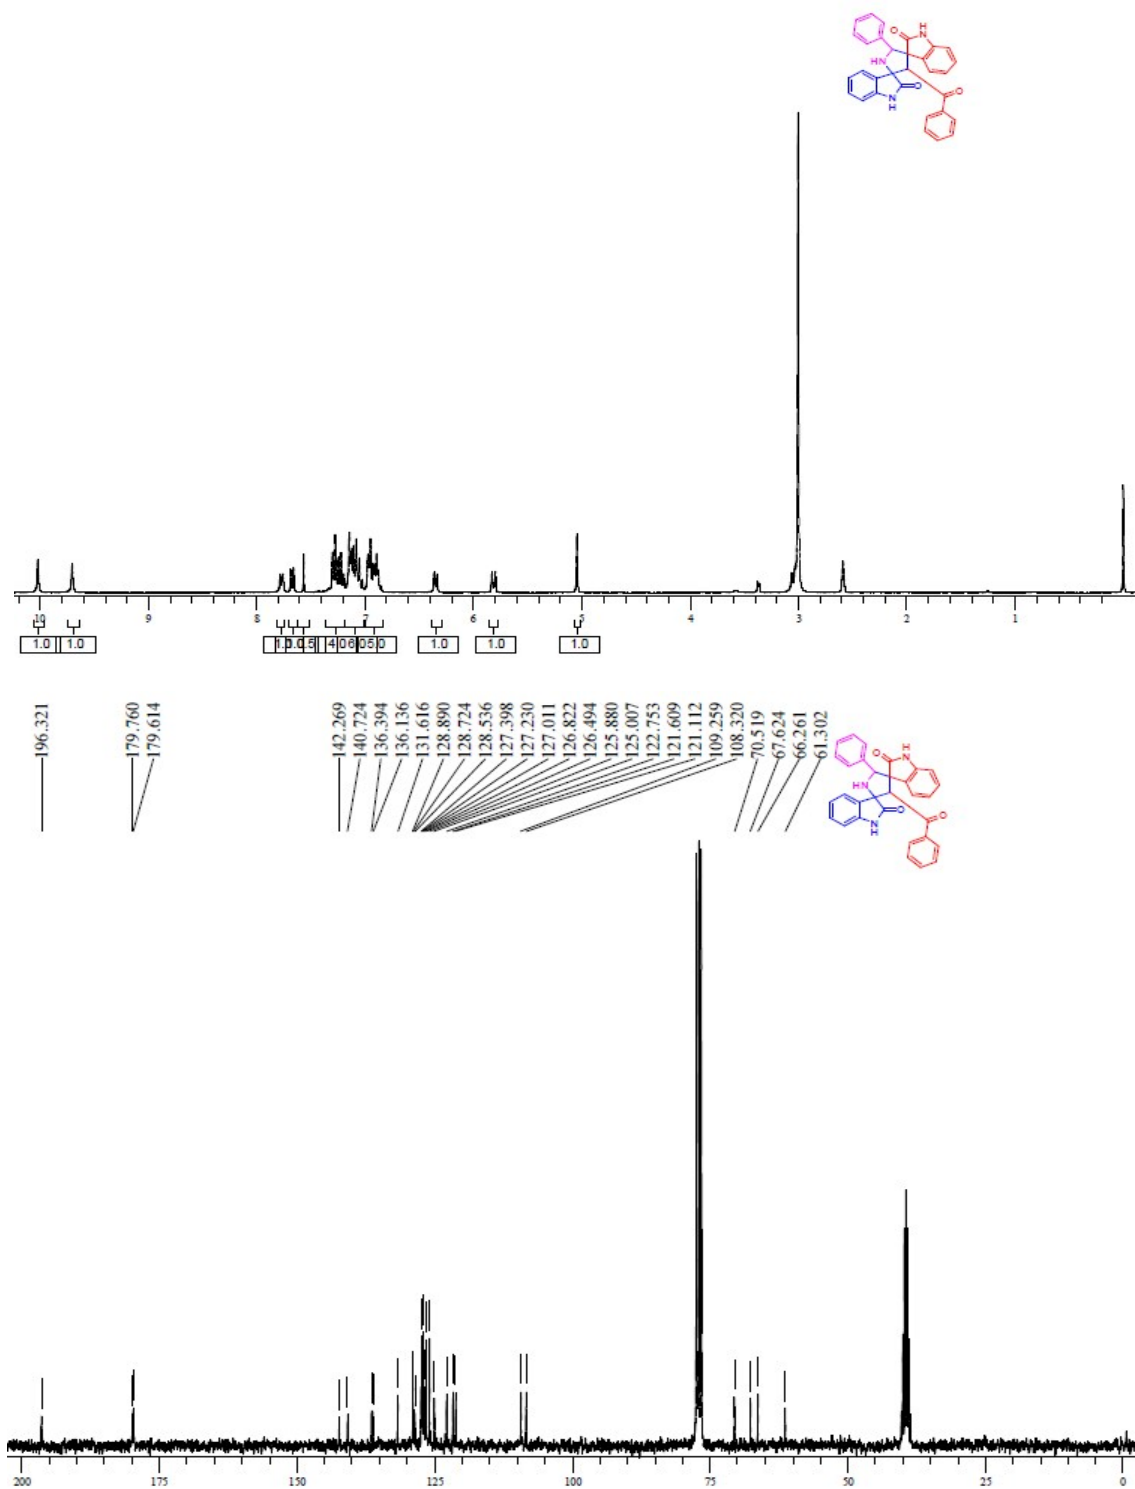

# <sup>1</sup>H and <sup>13</sup>C NMR Spectra of compound 4b

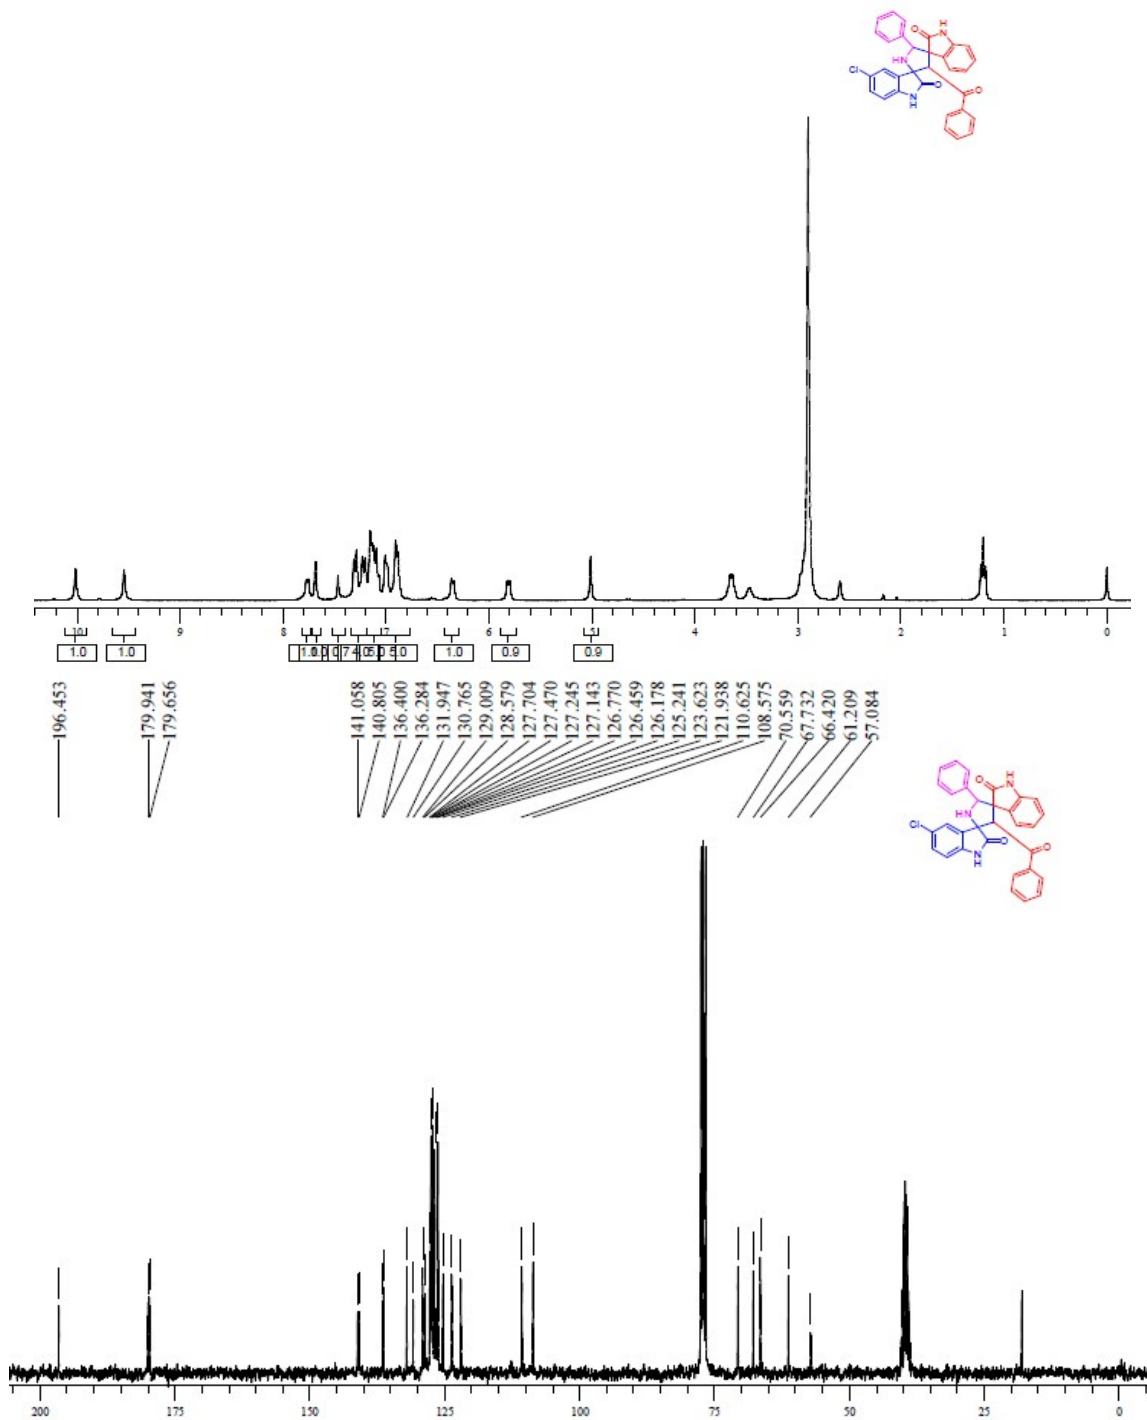



# $^1\text{H}$ and $^{13}\text{C}$ NMR Spectra of compound 4c

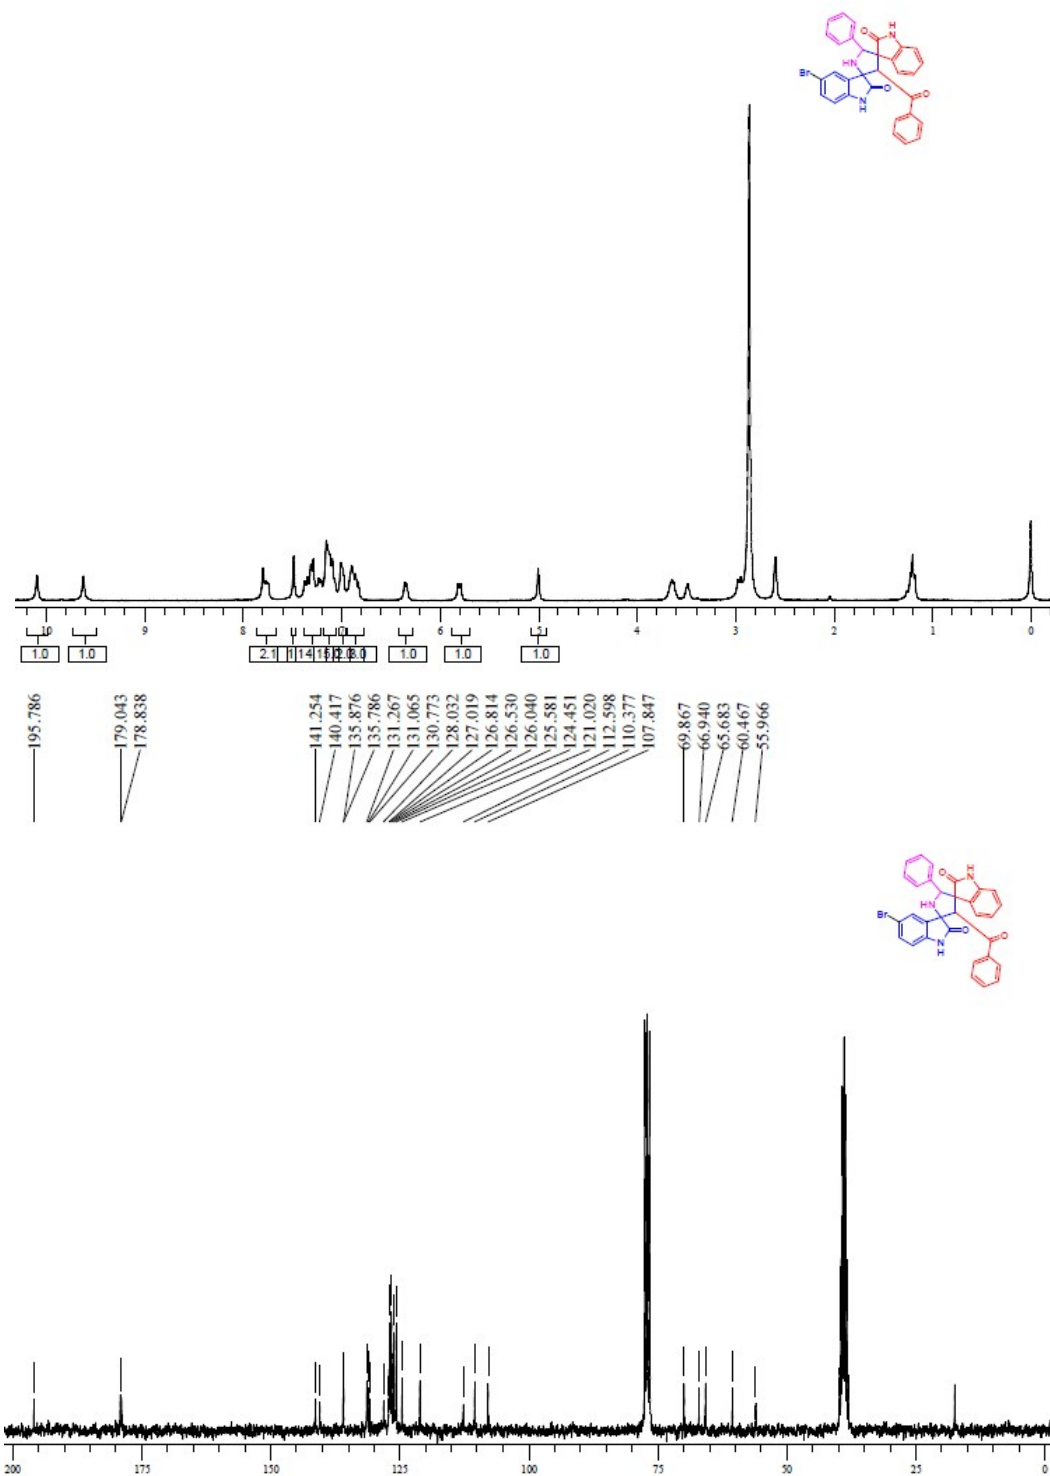

# <sup>1</sup>H and <sup>13</sup>C NMR Spectra of compound 4d

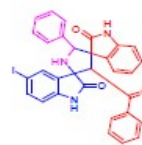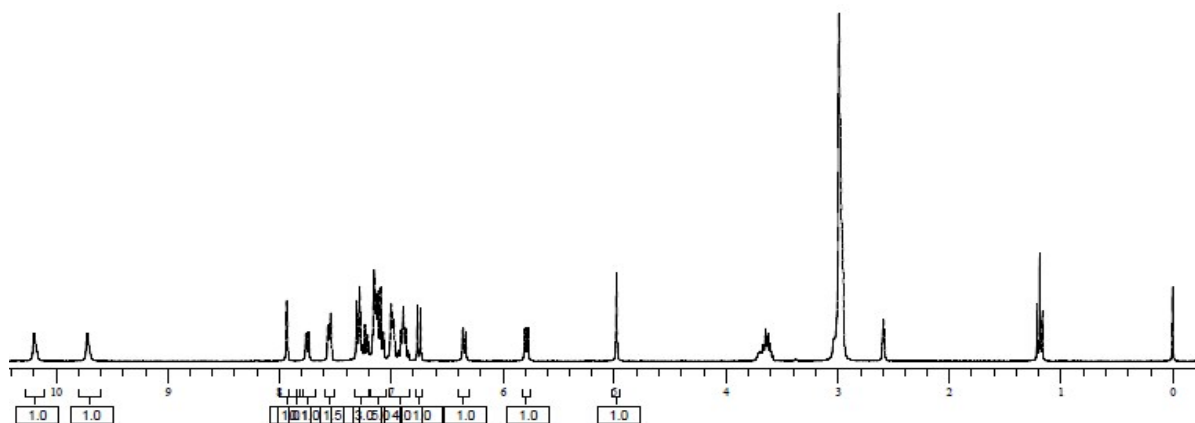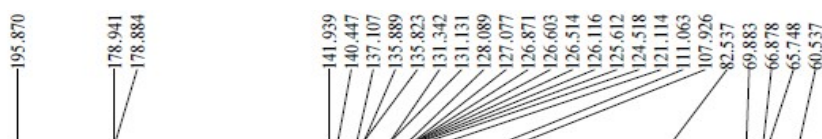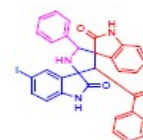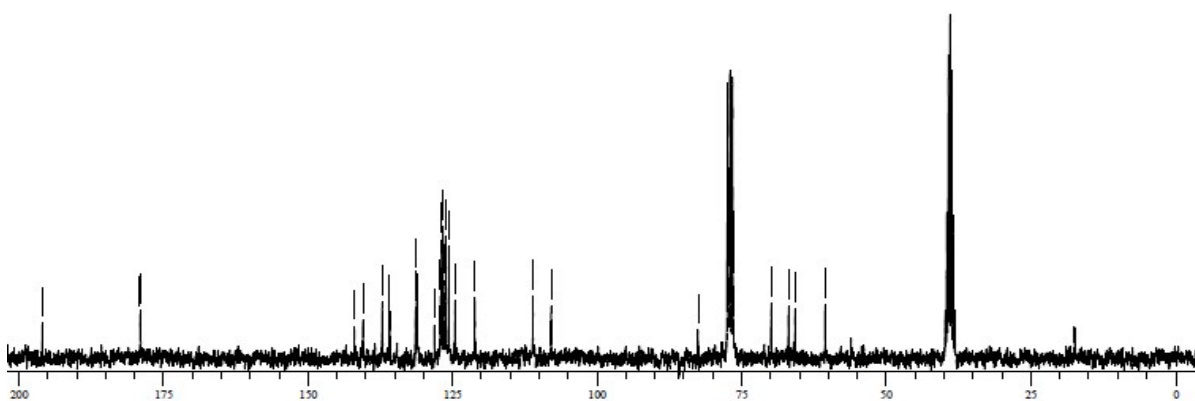

# <sup>1</sup>H and <sup>13</sup>C NMR Spectra of compound 4e

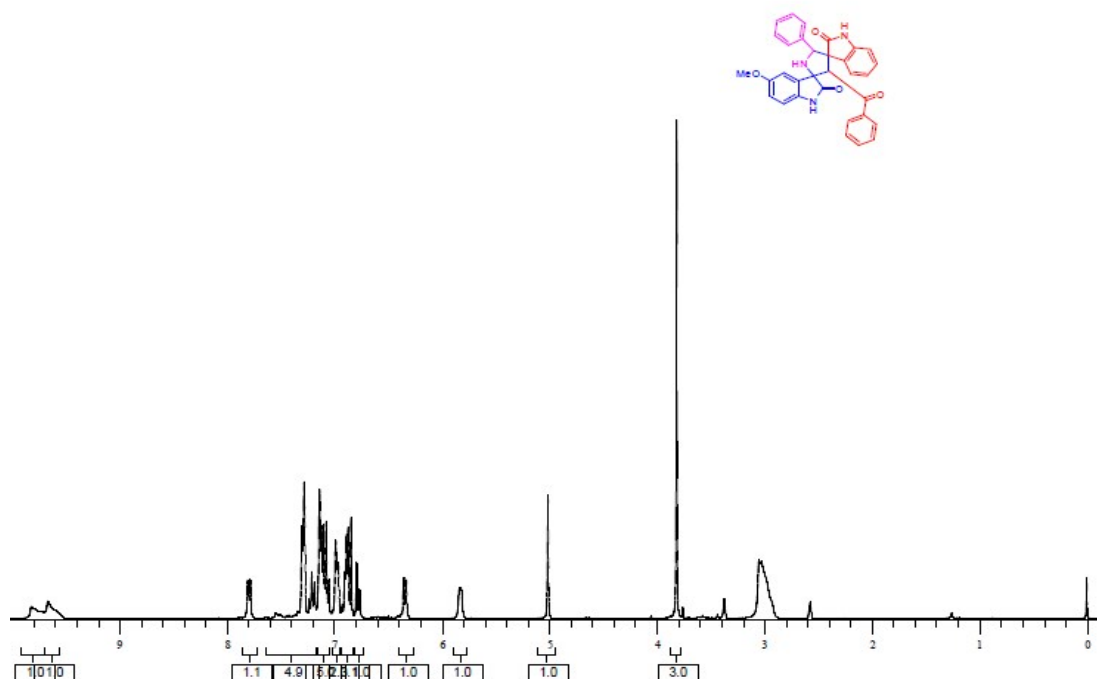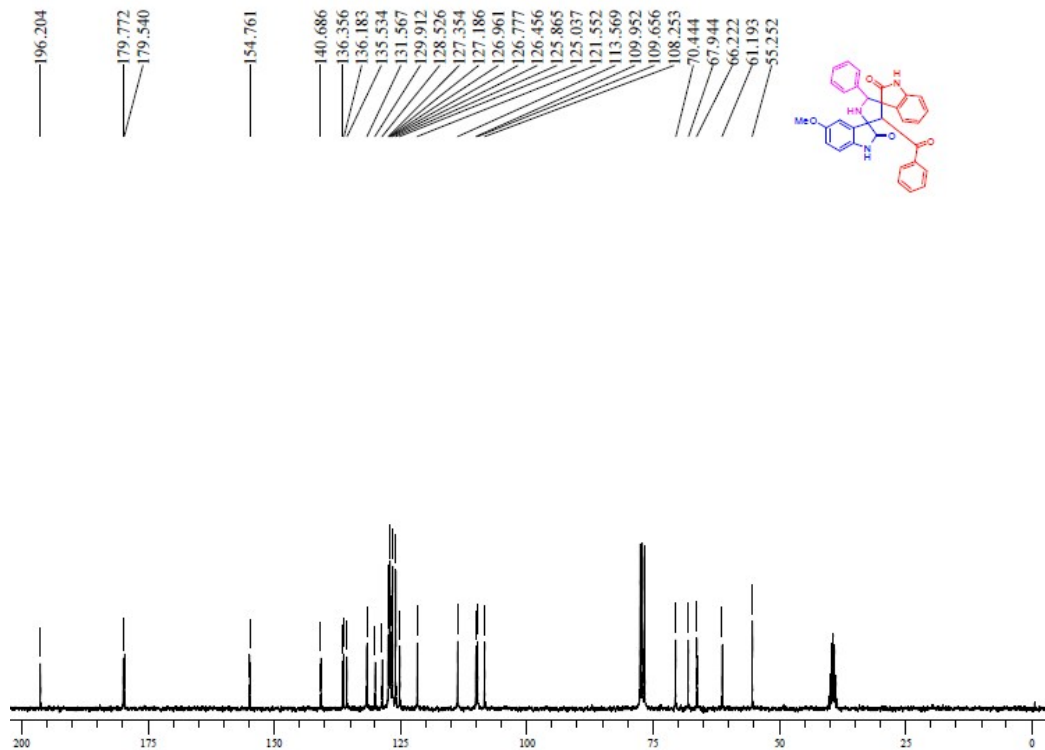

# <sup>1</sup>H and <sup>13</sup>C NMR Spectra of compound 4f

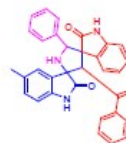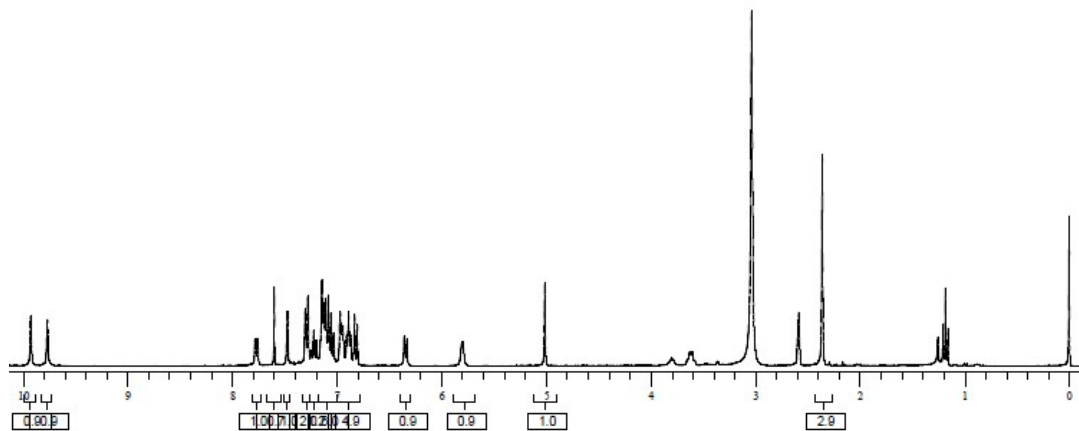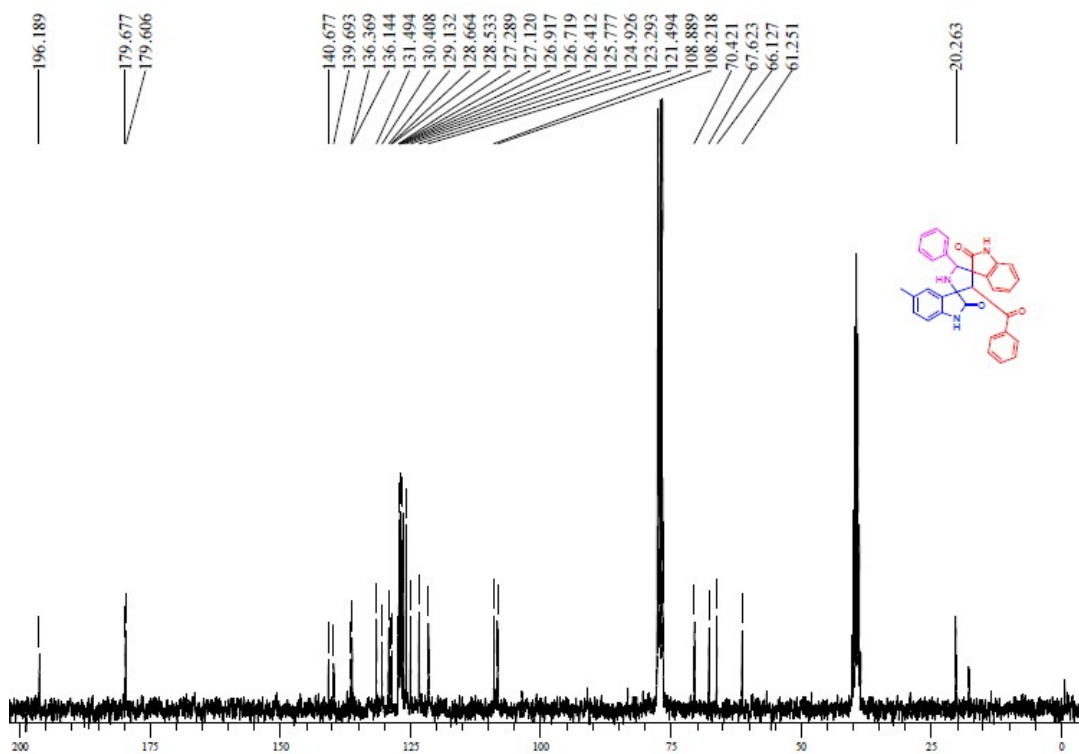

# <sup>1</sup>H and <sup>13</sup>C NMR Spectra of compound 4g

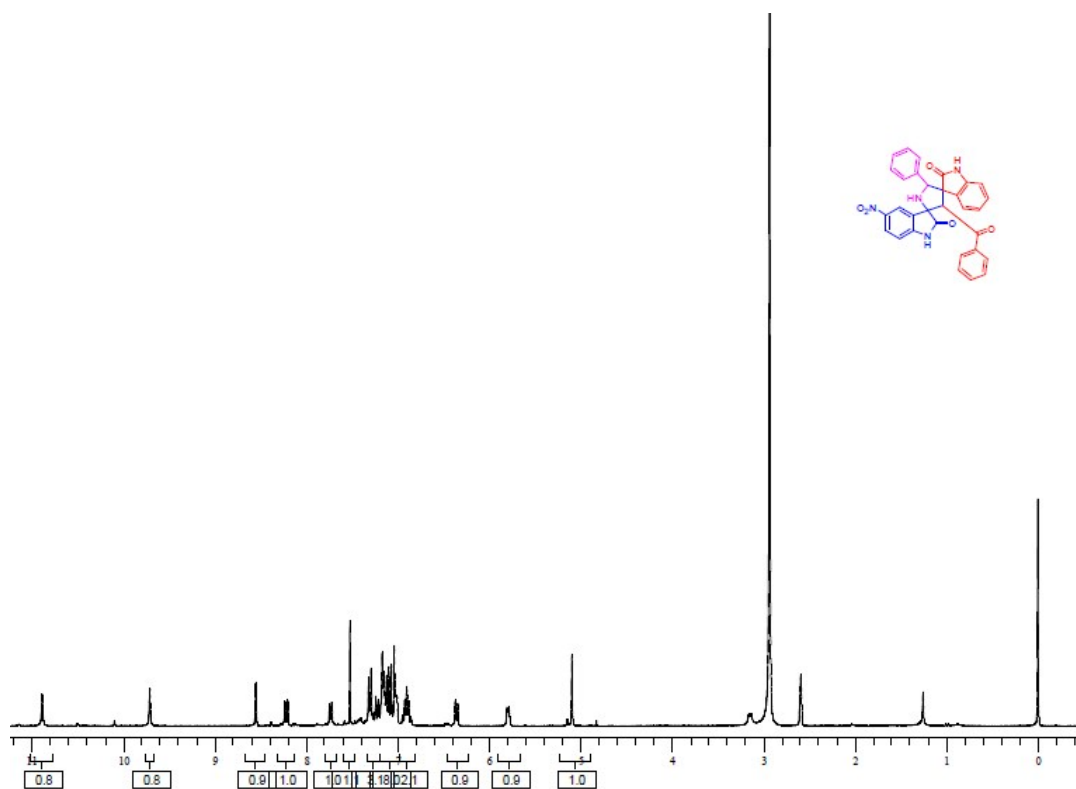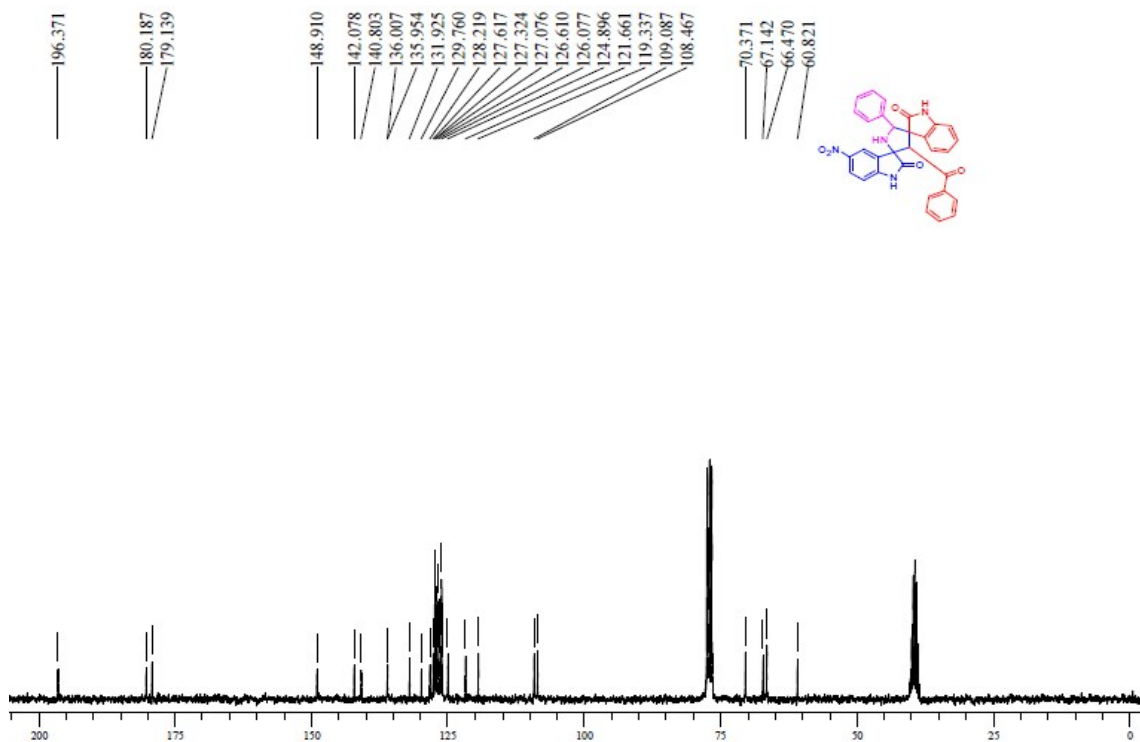

# <sup>1</sup>H and <sup>13</sup>C NMR Spectra of compound 4h

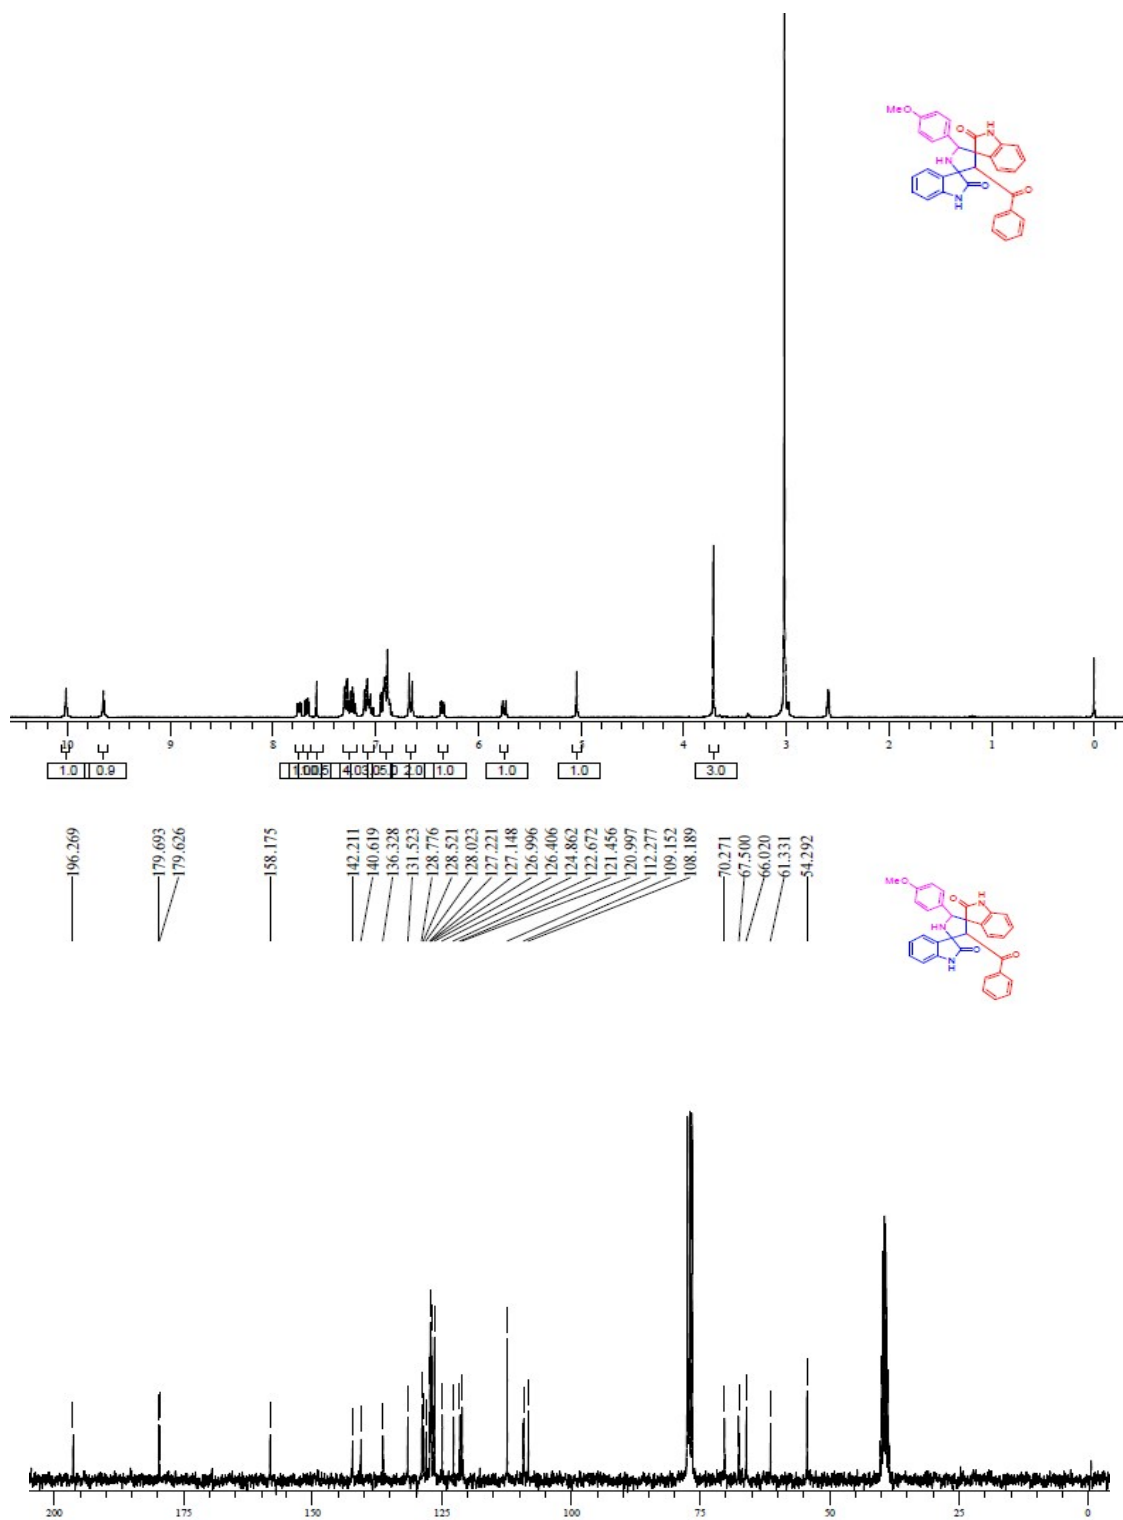



# $^1\text{H}$ and $^{13}\text{C}$ NMR Spectra of compound 4j

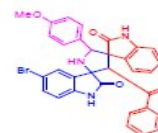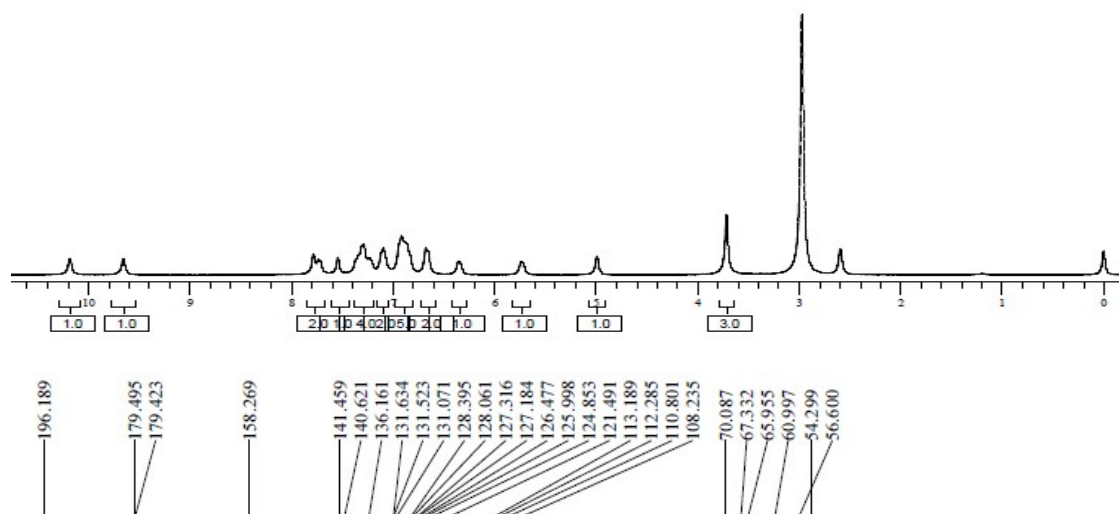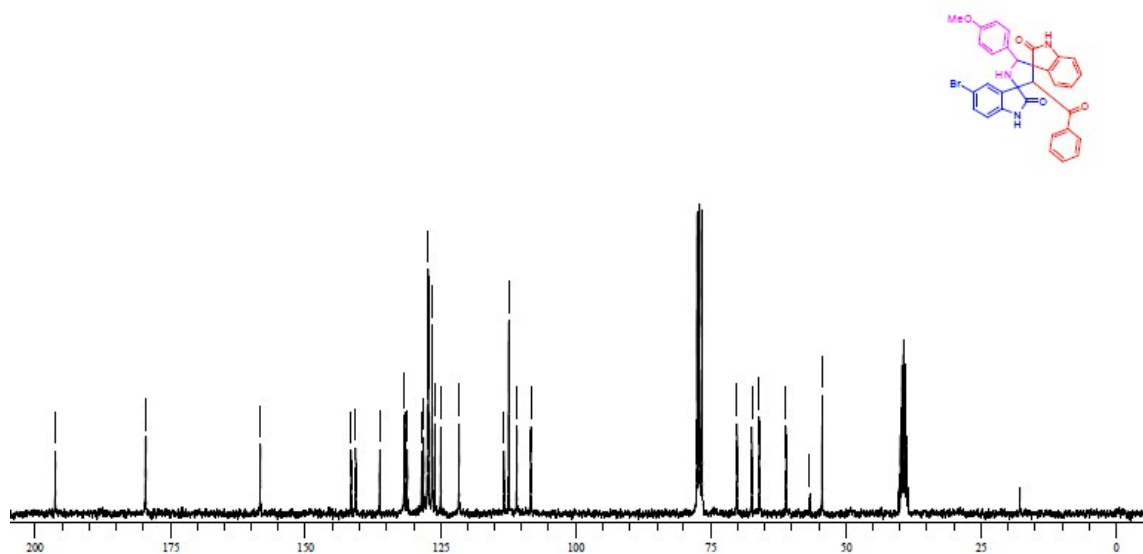



# <sup>1</sup>H and <sup>13</sup>C NMR Spectra of compound 4k

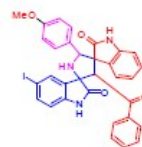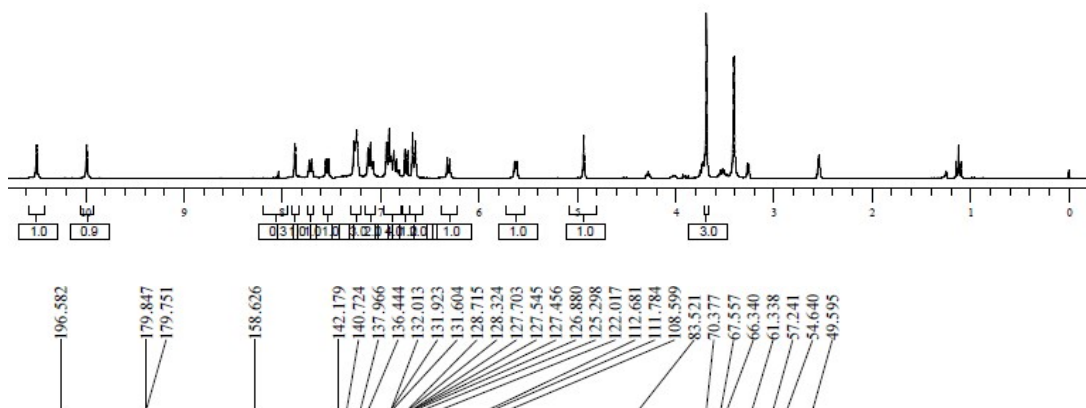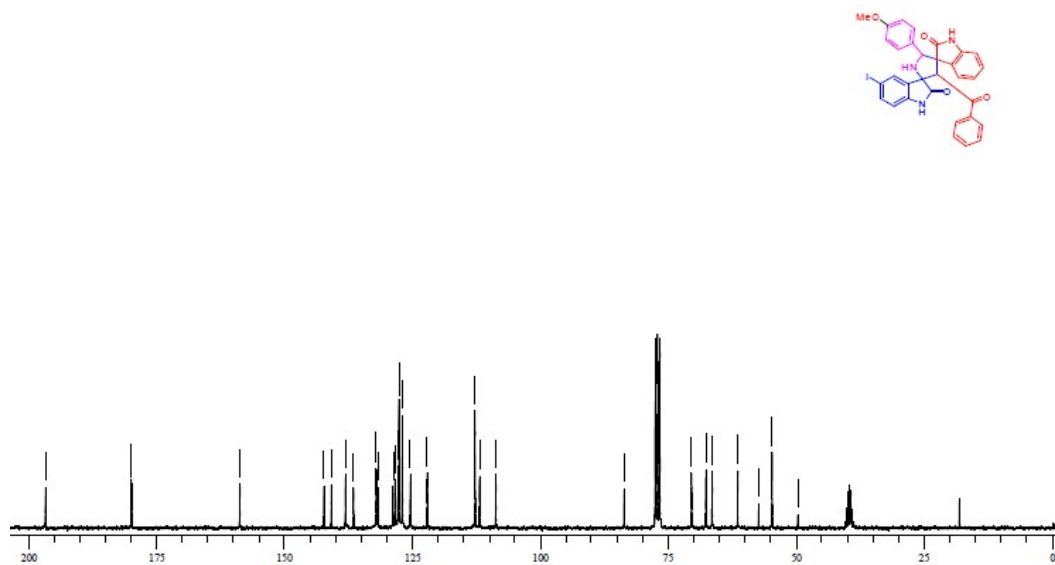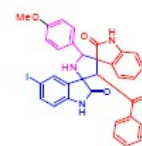

# <sup>1</sup>H and <sup>13</sup>C NMR Spectra of compound 4I

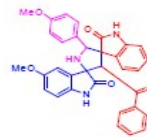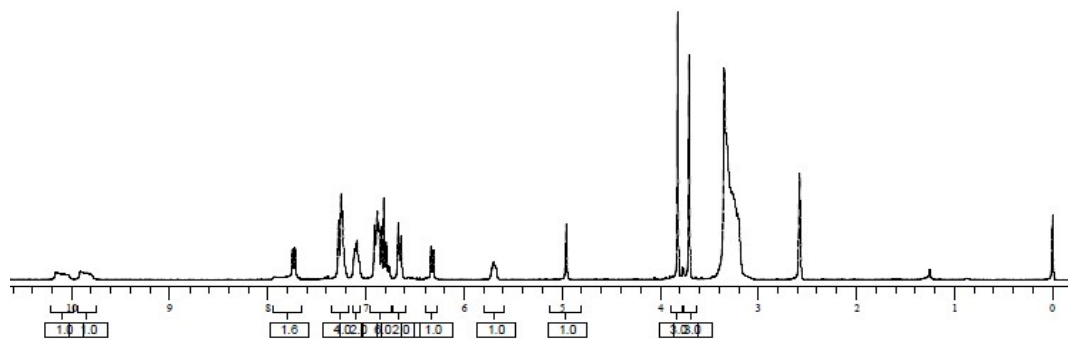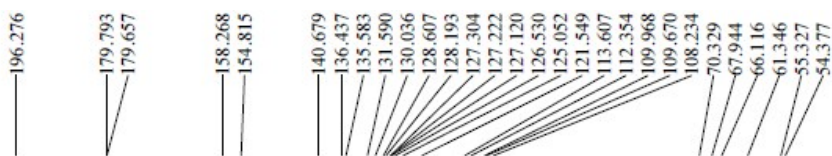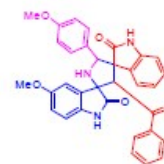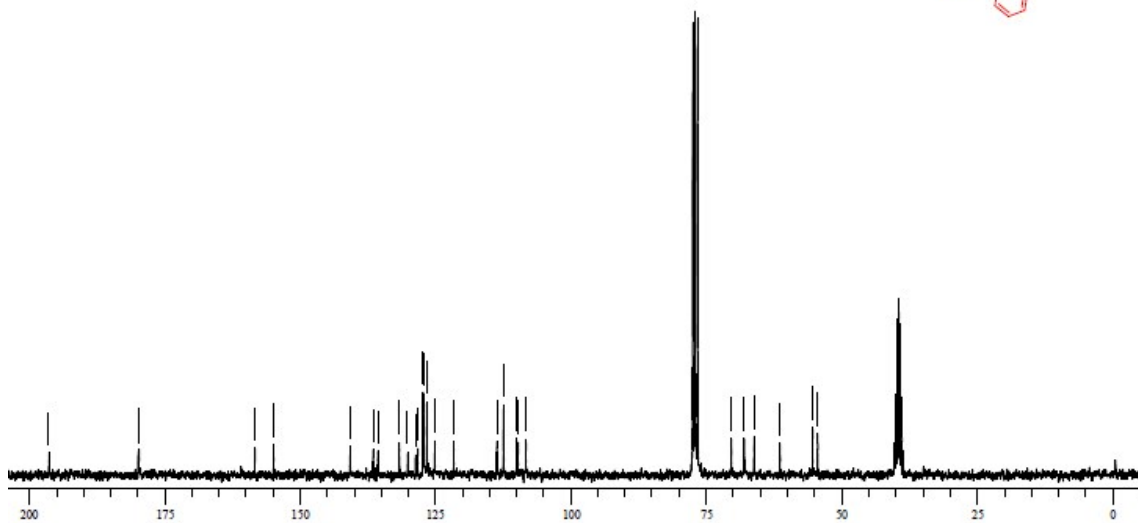

# <sup>1</sup>H and <sup>13</sup>C NMR Spectra of compound 4m

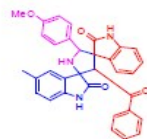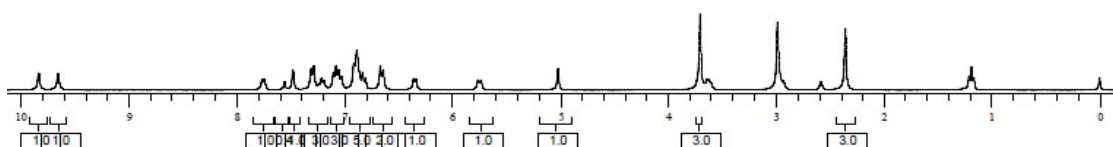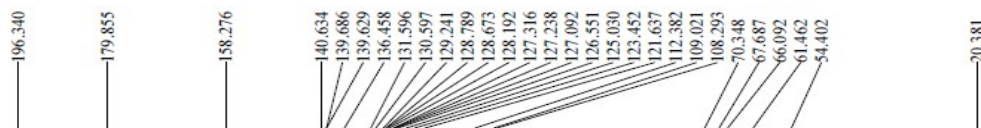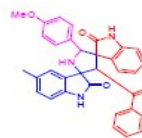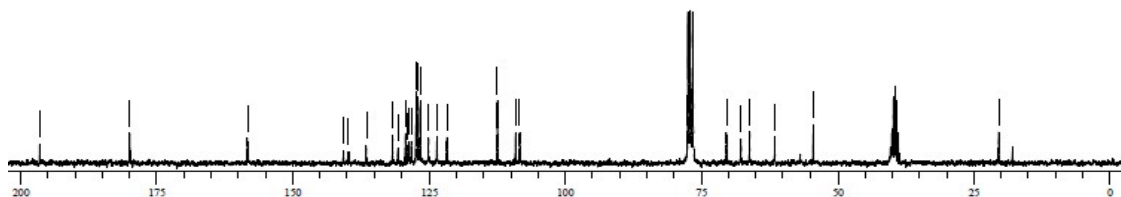

# $^1\text{H}$ and $^{13}\text{C}$ NMR Spectra of compound 4n

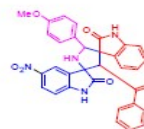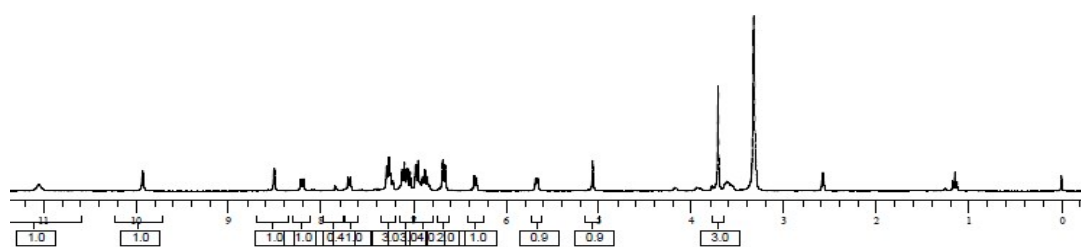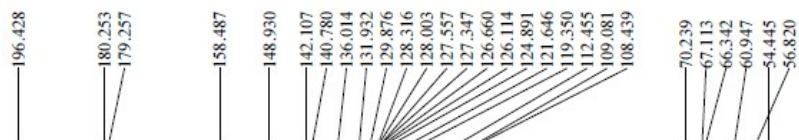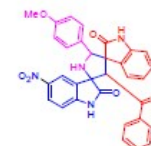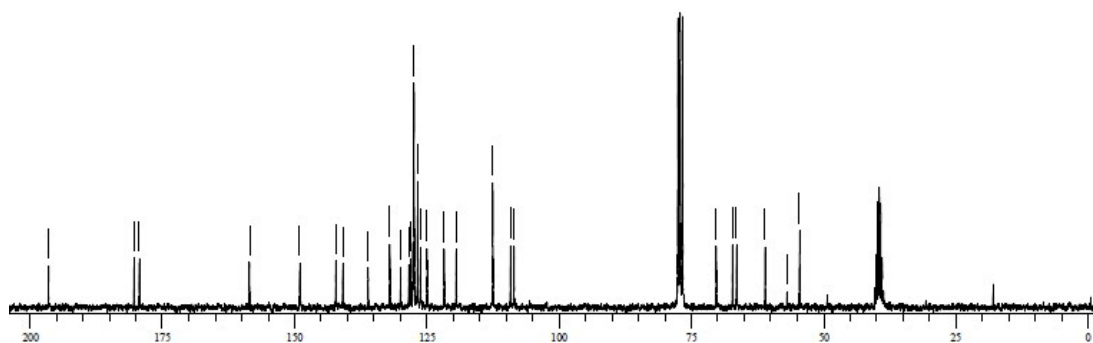

# <sup>1</sup>H and <sup>13</sup>C NMR Spectra of compound 4o

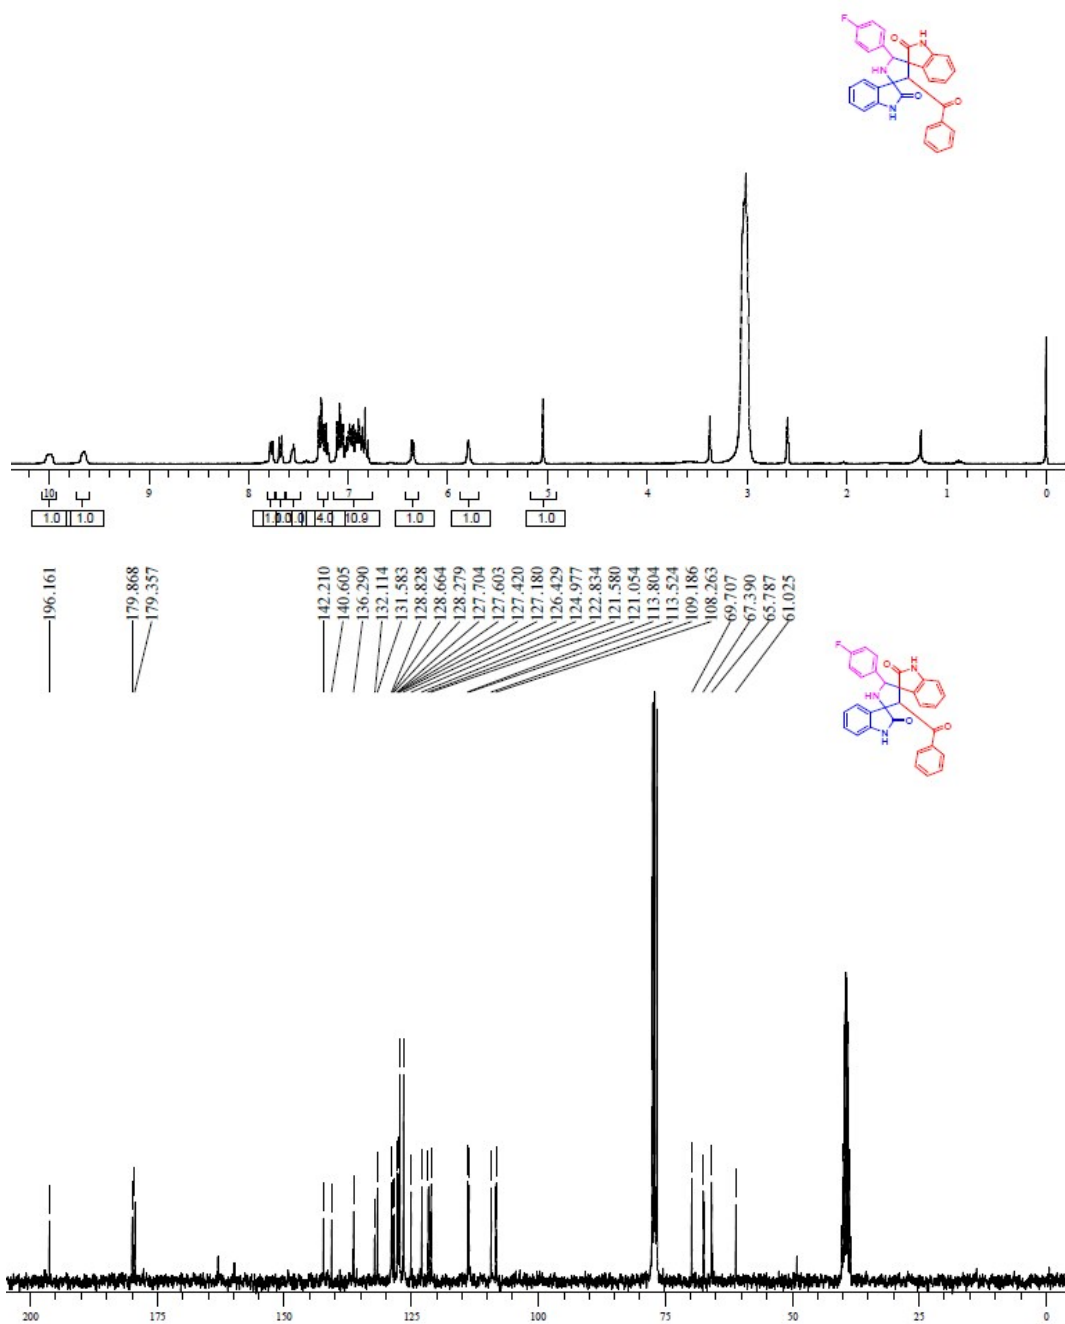

### <sup>1</sup>H and <sup>13</sup>C NMR Spectra of compound 4p

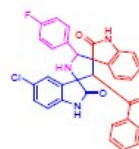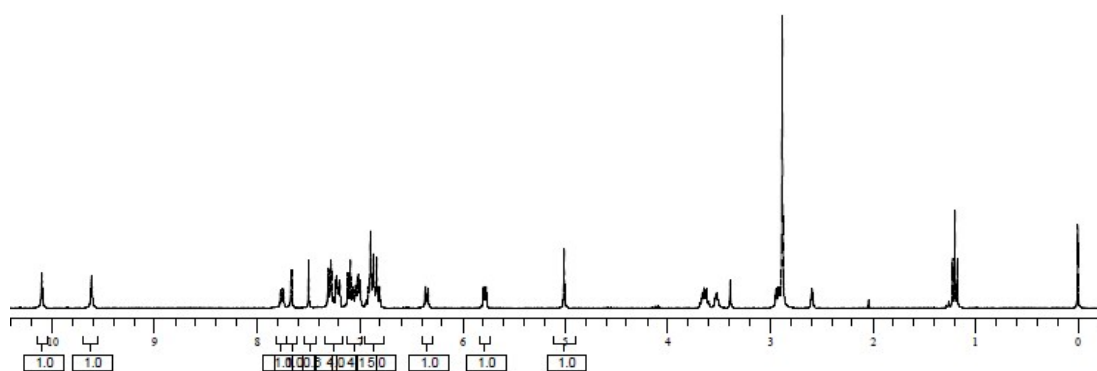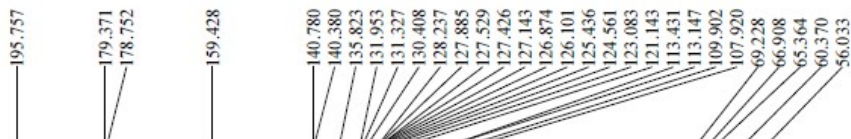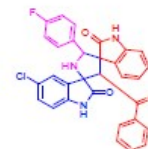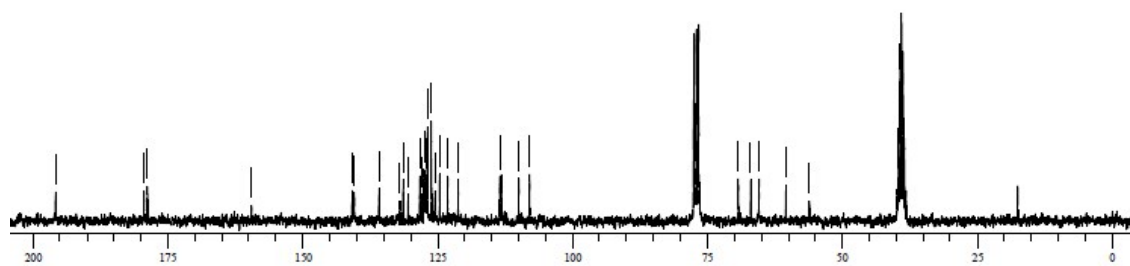

# <sup>1</sup>H and <sup>13</sup>C NMR Spectra of compound 4q

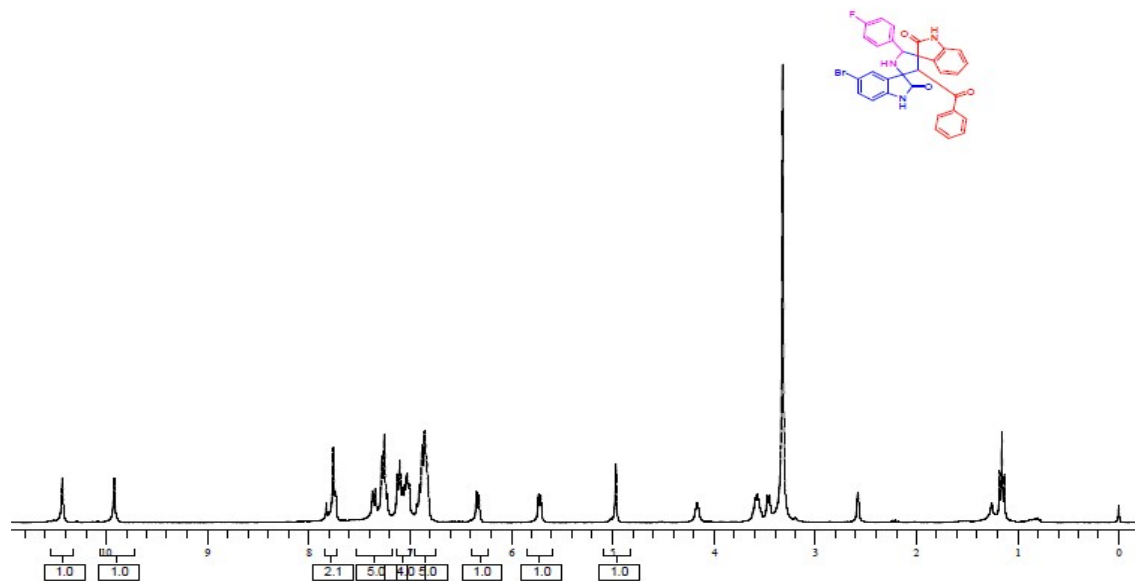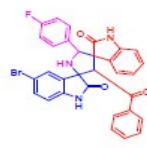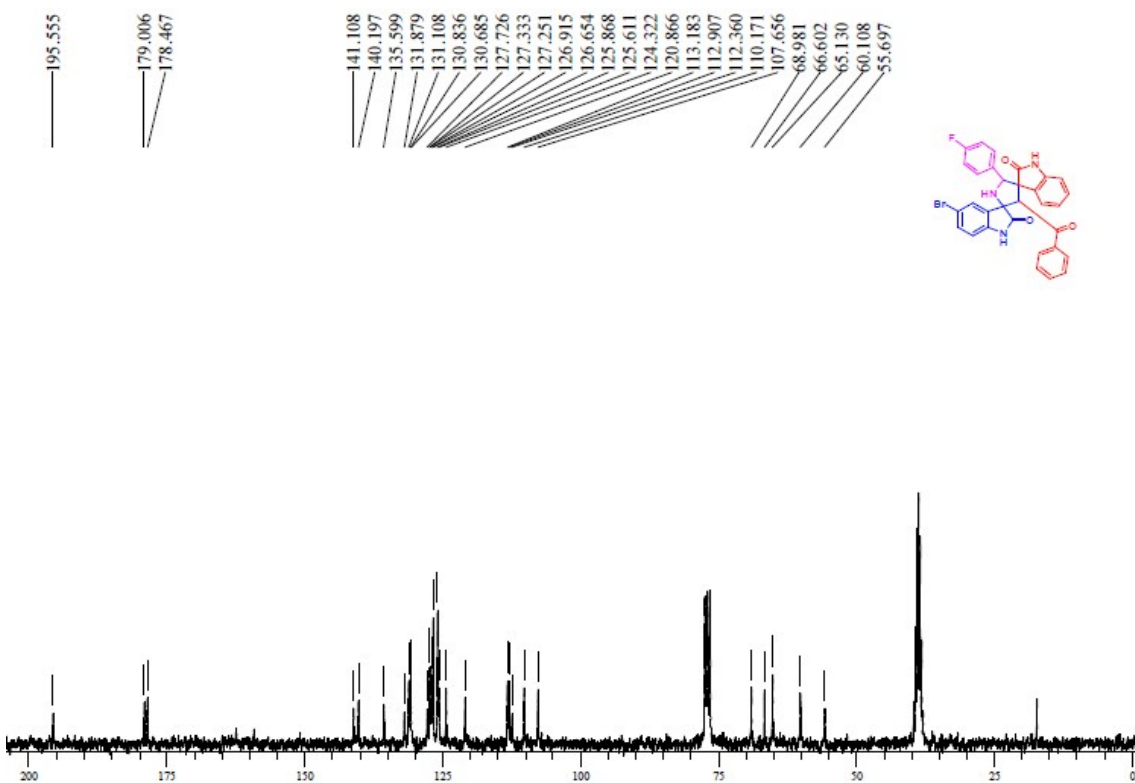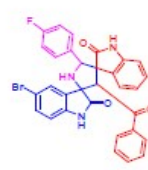

# <sup>1</sup>H and <sup>13</sup>C NMR Spectra of compound 4r

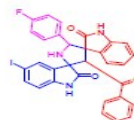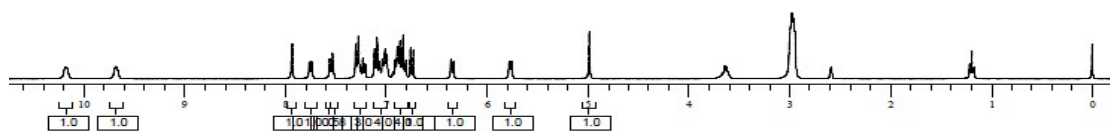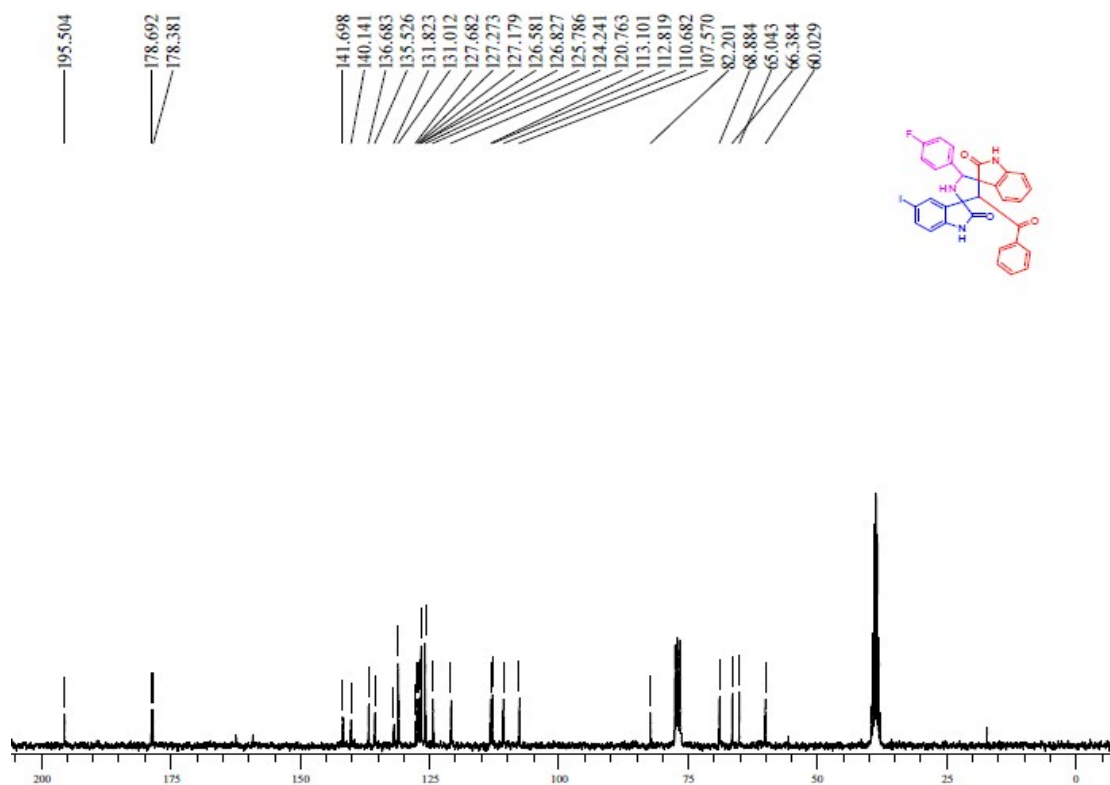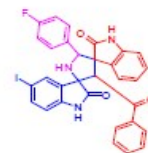



### <sup>1</sup>H and <sup>13</sup>C NMR Spectra of compound 4s

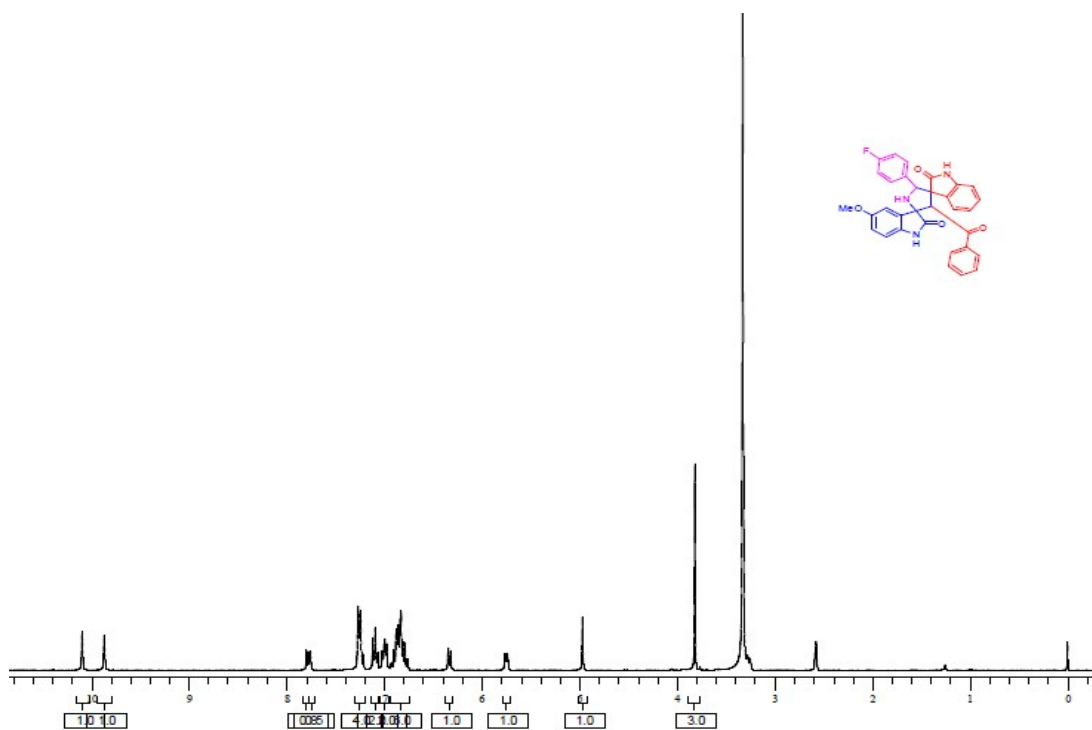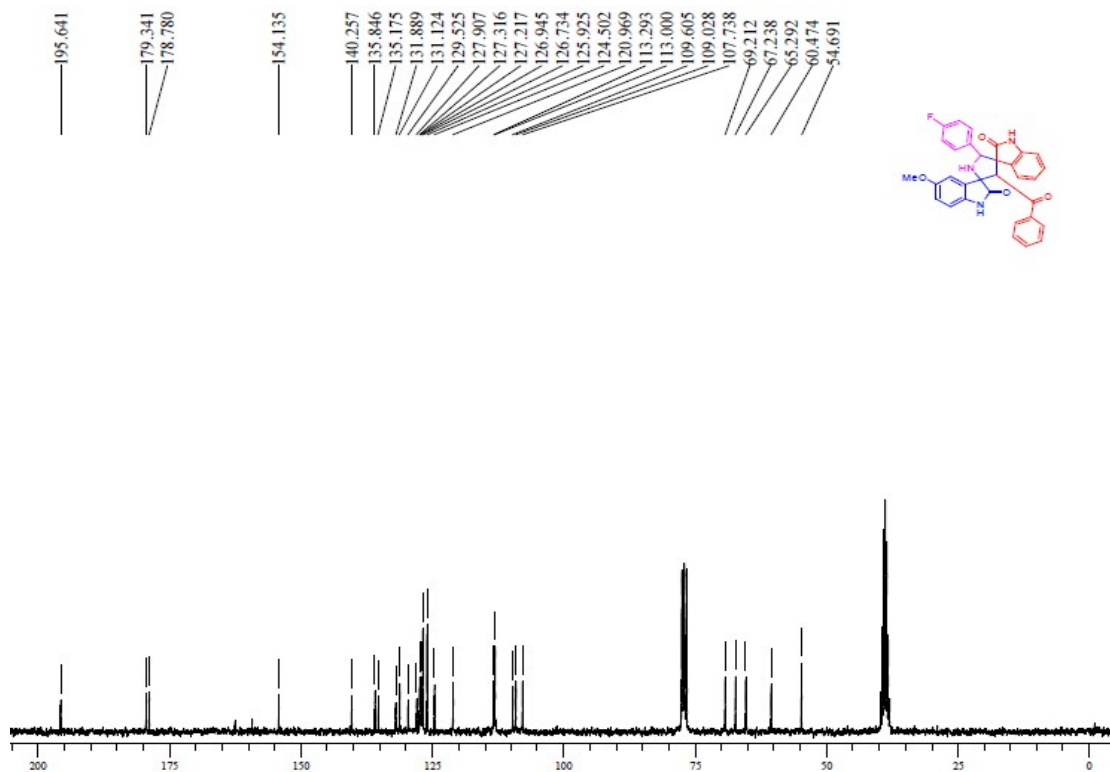

# <sup>1</sup>H and <sup>13</sup>C NMR Spectra of compound 4t

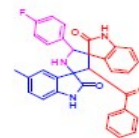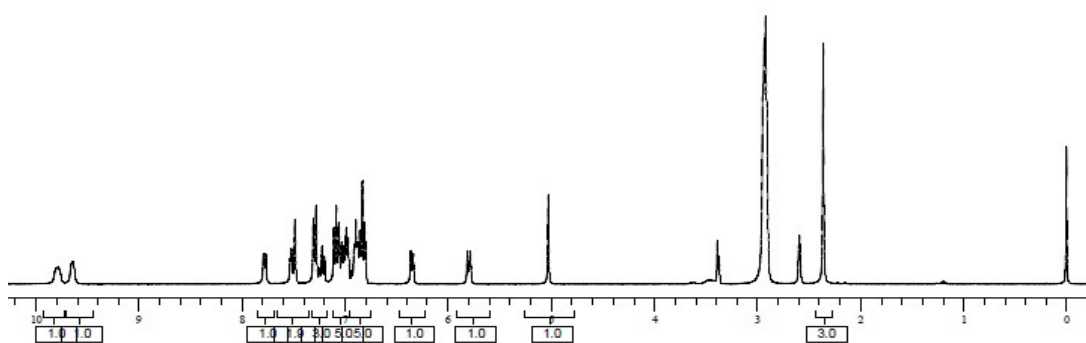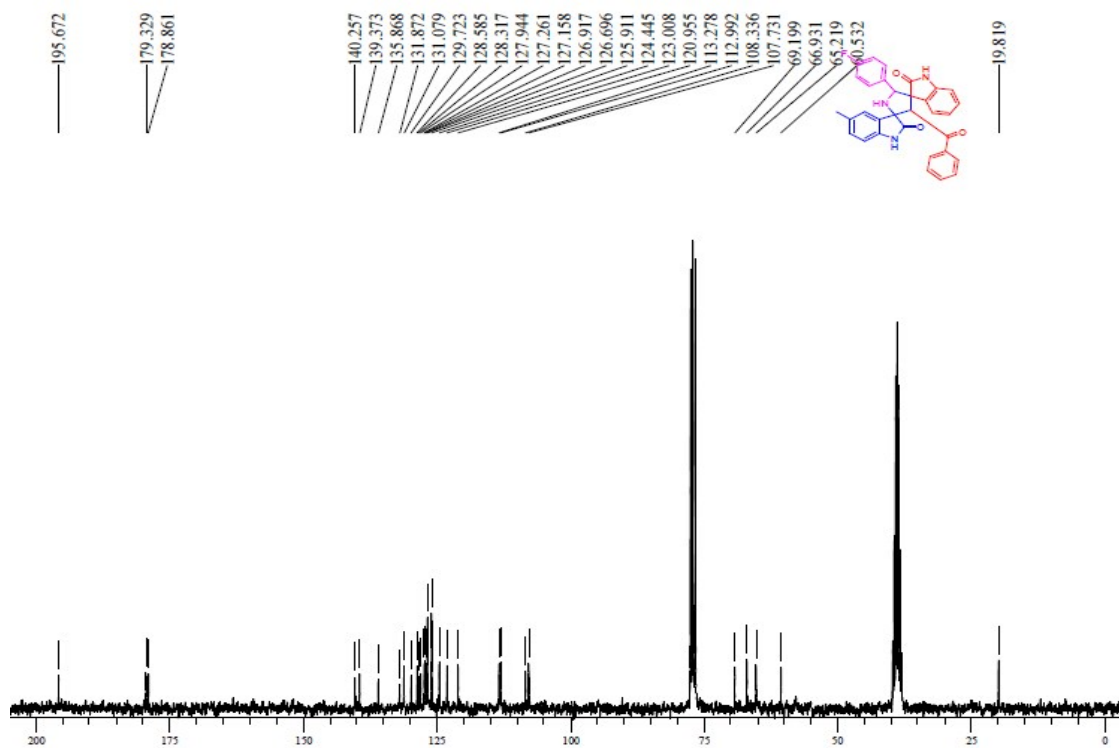

## Crystal data and tables for 4s.

Table 1. Crystal data and structure refinement for 4s

|                                         |                                             |                              |
|-----------------------------------------|---------------------------------------------|------------------------------|
| Identification code                     | 4s                                          |                              |
| Empirical formula                       | $C_{32}H_{24}F N_3O_4$                      |                              |
| Formula weight                          | 533.54                                      |                              |
| Temperature                             | 294(2) K                                    |                              |
| Wavelength                              | 0.71073 Å                                   |                              |
| Crystal system                          | Triclinic                                   |                              |
| Space group                             | P -1                                        |                              |
| Unit cell dimensions                    | a = 10.7757(13) Å                           | $\alpha = 84.249(2)^\circ$ . |
|                                         | b = 11.2641(13) Å                           | $\beta = 66.118(2)^\circ$ .  |
|                                         | c = 12.0018(14) Å                           | $\gamma = 82.085(2)^\circ$ . |
| Volume                                  | 1317.8(3) Å <sup>3</sup>                    |                              |
| Z                                       | 2                                           |                              |
| Density (calculated)                    | 1.345 Mg/m <sup>3</sup>                     |                              |
| Absorption coefficient                  | 0.095 mm <sup>-1</sup>                      |                              |
| F(000)                                  | 556                                         |                              |
| Crystal size                            | 0.180 x 0.160 x 0.070 mm <sup>3</sup>       |                              |
| $\theta$ range for data collection      | 1.827 to 28.135°.                           |                              |
| Index ranges                            | -14 ≤ h ≤ 14, -14 ≤ k ≤ 14, -15 ≤ l ≤ 15    |                              |
| Reflections collected                   | 15464                                       |                              |
| Independent reflections                 | 6152 [R(int) = 0.0188]                      |                              |
| Completeness to $\theta = 25.242^\circ$ | 99.7 %                                      |                              |
| Refinement method                       | Full-matrix least-squares on F <sup>2</sup> |                              |
| Data / restraints / parameters          | 6152 / 0 / 374                              |                              |
| Goodness-of-fit on F <sup>2</sup>       | 1.043                                       |                              |
| Final R indices [I > 2σ(I)]             | R1 = 0.0437, wR2 = 0.1187                   |                              |
| R indices (all data)                    | R1 = 0.0506, wR2 = 0.1251                   |                              |
| Largest diff. peak and hole             | 0.262 and -0.208 e.Å <sup>-3</sup>          |                              |

Table 2. Atomic coordinates (  $\times 10^4$ ) and equivalent isotropic displacement parameters ( $\text{\AA}^2 \times 10^3$ ) for **4s**.  $U(\text{eq})$  is defined as one third of the trace of the orthogonalized  $U^{ij}$  tensor.

|       | x        | y       | z        | $U(\text{eq})$ |
|-------|----------|---------|----------|----------------|
| C(1)  | 7282(1)  | 1907(1) | -289(1)  | 35(1)          |
| C(2)  | 8342(1)  | 932(1)  | -69(1)   | 40(1)          |
| C(3)  | 9313(1)  | 1598(1) | -2055(1) | 38(1)          |
| C(4)  | 10229(1) | 1754(1) | -3239(1) | 45(1)          |
| C(5)  | 9839(2)  | 2581(1) | -4007(1) | 49(1)          |
| C(6)  | 8559(2)  | 3225(1) | -3585(1) | 47(1)          |
| C(7)  | 7633(1)  | 3061(1) | -2379(1) | 43(1)          |
| C(8)  | 8025(1)  | 2244(1) | -1624(1) | 36(1)          |
| C(9)  | 5292(1)  | 1435(1) | 1371(1)  | 38(1)          |
| C(10) | 5612(1)  | 2645(1) | 1708(1)  | 36(1)          |
| C(11) | 6861(1)  | 2988(1) | 534(1)   | 34(1)          |
| C(12) | 8013(1)  | 3402(1) | 776(1)   | 40(1)          |
| C(13) | 7861(1)  | 4638(1) | 1181(1)  | 44(1)          |
| C(14) | 6804(2)  | 5502(1) | 1197(1)  | 52(1)          |
| C(15) | 6756(2)  | 6647(2) | 1553(2)  | 65(1)          |
| C(16) | 7770(2)  | 6930(2) | 1873(2)  | 74(1)          |
| C(17) | 8825(2)  | 6076(2) | 1855(2)  | 70(1)          |
| C(18) | 8877(2)  | 4937(2) | 1515(1)  | 56(1)          |
| C(19) | 6643(1)  | 1808(2) | 3318(1)  | 56(1)          |
| C(20) | 4416(1)  | 3648(1) | 1933(1)  | 40(1)          |
| C(21) | 4701(2)  | 3273(2) | 3727(1)  | 53(1)          |
| C(22) | 4549(2)  | 3343(2) | 4915(2)  | 82(1)          |
| C(23) | 5471(2)  | 2630(2) | 5293(2)  | 92(1)          |
| C(24) | 6493(2)  | 1877(2) | 4517(2)  | 78(1)          |
| C(25) | 5741(1)  | 2524(1) | 2922(1)  | 42(1)          |
| C(26) | 3798(1)  | 1260(1) | 1863(1)  | 40(1)          |
| C(27) | 2973(1)  | 1735(1) | 1256(1)  | 50(1)          |
| C(28) | 1584(1)  | 1630(1) | 1765(2)  | 55(1)          |
| C(29) | 1053(1)  | 1046(1) | 2878(2)  | 52(1)          |
| C(30) | 1824(2)  | 542(2)  | 3498(2)  | 58(1)          |

|       |         |         |          |       |
|-------|---------|---------|----------|-------|
| C(31) | 3213(1) | 651(1)  | 2978(1)  | 51(1) |
| C(33) | 8846(2) | 4111(2) | -5563(2) | 83(1) |
| F(1)  | -317(1) | 963(1)  | 3393(1)  | 76(1) |
| N(1)  | 9458(1) | 819(1)  | -1119(1) | 42(1) |
| N(2)  | 3910(1) | 3898(1) | 3133(1)  | 55(1) |
| N(3)  | 5951(1) | 1474(1) | 34(1)    | 39(1) |
| O(1)  | 8157(1) | 316(1)  | 872(1)   | 52(1) |
| O(2)  | 9041(1) | 2732(1) | 631(1)   | 59(1) |
| O(3)  | 4016(1) | 4147(1) | 1182(1)  | 49(1) |
| O(4)  | 8112(1) | 4077(1) | -4282(1) | 68(1) |

---

Table 3. Bond lengths [Å] and angles [°] for **4s**.

---

|             |            |
|-------------|------------|
| C(1)-N(3)   | 1.4664(15) |
| C(1)-C(8)   | 1.5079(16) |
| C(1)-C(11)  | 1.5458(16) |
| C(1)-C(2)   | 1.5570(16) |
| C(2)-O(1)   | 1.2226(15) |
| C(2)-N(1)   | 1.3472(16) |
| C(3)-C(4)   | 1.3736(17) |
| C(3)-C(8)   | 1.3926(16) |
| C(3)-N(1)   | 1.4004(16) |
| C(4)-C(5)   | 1.3881(19) |
| C(4)-H(4)   | 0.9300     |
| C(5)-C(6)   | 1.385(2)   |
| C(5)-H(5)   | 0.9300     |
| C(6)-O(4)   | 1.3750(16) |
| C(6)-C(7)   | 1.3976(18) |
| C(7)-C(8)   | 1.3722(17) |
| C(7)-H(7)   | 0.9300     |
| C(9)-N(3)   | 1.4667(16) |
| C(9)-C(26)  | 1.5079(16) |
| C(9)-C(10)  | 1.5790(17) |
| C(9)-H(9)   | 0.9800     |
| C(10)-C(25) | 1.5096(16) |
| C(10)-C(20) | 1.5451(16) |
| C(10)-C(11) | 1.5631(16) |
| C(11)-C(12) | 1.5231(16) |
| C(11)-H(11) | 0.9800     |
| C(12)-O(2)  | 1.2112(16) |
| C(12)-C(13) | 1.4867(19) |
| C(13)-C(14) | 1.388(2)   |
| C(13)-C(18) | 1.399(2)   |
| C(14)-C(15) | 1.387(2)   |
| C(14)-H(14) | 0.9300     |
| C(15)-C(16) | 1.379(3)   |

|              |            |
|--------------|------------|
| C(15)-H(15)  | 0.9300     |
| C(16)-C(17)  | 1.380(3)   |
| C(16)-H(16)  | 0.9300     |
| C(17)-C(18)  | 1.372(2)   |
| C(17)-H(17)  | 0.9300     |
| C(18)-H(18)  | 0.9300     |
| C(19)-C(25)  | 1.3797(18) |
| C(19)-C(24)  | 1.390(2)   |
| C(19)-H(19)  | 0.9300     |
| C(20)-O(3)   | 1.2093(15) |
| C(20)-N(2)   | 1.3611(17) |
| C(21)-C(22)  | 1.377(2)   |
| C(21)-C(25)  | 1.3882(19) |
| C(21)-N(2)   | 1.3998(18) |
| C(22)-C(23)  | 1.381(3)   |
| C(22)-H(22)  | 0.9300     |
| C(23)-C(24)  | 1.368(3)   |
| C(23)-H(23)  | 0.9300     |
| C(24)-H(24)  | 0.9300     |
| C(26)-C(31)  | 1.3818(18) |
| C(26)-C(27)  | 1.3869(18) |
| C(27)-C(28)  | 1.3863(19) |
| C(27)-H(27)  | 0.9300     |
| C(28)-C(29)  | 1.361(2)   |
| C(28)-H(28)  | 0.9300     |
| C(29)-C(30)  | 1.361(2)   |
| C(29)-F(1)   | 1.3626(15) |
| C(30)-C(31)  | 1.387(2)   |
| C(30)-H(30)  | 0.9300     |
| C(31)-H(31)  | 0.9300     |
| C(33)-O(4)   | 1.4147(19) |
| C(33)-H(33A) | 0.9600     |
| C(33)-H(33B) | 0.9600     |
| C(33)-H(33C) | 0.9600     |
| N(1)-H(1N)   | 0.879(17)  |

|                  |            |
|------------------|------------|
| N(2)-H(2N)       | 0.88(2)    |
| N(3)-H(3N)       | 0.923(18)  |
| N(3)-C(1)-C(8)   | 114.99(10) |
| N(3)-C(1)-C(11)  | 100.57(9)  |
| C(8)-C(1)-C(11)  | 113.19(9)  |
| N(3)-C(1)-C(2)   | 112.91(10) |
| C(8)-C(1)-C(2)   | 101.19(9)  |
| C(11)-C(1)-C(2)  | 114.64(9)  |
| O(1)-C(2)-N(1)   | 125.77(11) |
| O(1)-C(2)-C(1)   | 125.77(11) |
| N(1)-C(2)-C(1)   | 108.29(10) |
| C(4)-C(3)-C(8)   | 121.55(12) |
| C(4)-C(3)-N(1)   | 128.89(11) |
| C(8)-C(3)-N(1)   | 109.56(10) |
| C(3)-C(4)-C(5)   | 118.20(12) |
| C(3)-C(4)-H(4)   | 120.9      |
| C(5)-C(4)-H(4)   | 120.9      |
| C(6)-C(5)-C(4)   | 120.56(12) |
| C(6)-C(5)-H(5)   | 119.7      |
| C(4)-C(5)-H(5)   | 119.7      |
| O(4)-C(6)-C(5)   | 123.91(12) |
| O(4)-C(6)-C(7)   | 115.17(12) |
| C(5)-C(6)-C(7)   | 120.90(12) |
| C(8)-C(7)-C(6)   | 118.25(12) |
| C(8)-C(7)-H(7)   | 120.9      |
| C(6)-C(7)-H(7)   | 120.9      |
| C(7)-C(8)-C(3)   | 120.54(11) |
| C(7)-C(8)-C(1)   | 130.35(10) |
| C(3)-C(8)-C(1)   | 109.07(10) |
| N(3)-C(9)-C(26)  | 113.42(10) |
| N(3)-C(9)-C(10)  | 103.32(9)  |
| C(26)-C(9)-C(10) | 114.96(10) |
| N(3)-C(9)-H(9)   | 108.3      |
| C(26)-C(9)-H(9)  | 108.3      |



|                   |            |
|-------------------|------------|
| C(10)-C(9)-H(9)   | 108.3      |
| C(25)-C(10)-C(20) | 101.79(10) |
| C(25)-C(10)-C(11) | 119.05(10) |
| C(20)-C(10)-C(11) | 109.47(9)  |
| C(25)-C(10)-C(9)  | 111.93(10) |
| C(20)-C(10)-C(9)  | 112.28(9)  |
| C(11)-C(10)-C(9)  | 102.61(9)  |
| C(12)-C(11)-C(1)  | 114.96(9)  |
| C(12)-C(11)-C(10) | 114.56(9)  |
| C(1)-C(11)-C(10)  | 106.03(9)  |
| C(12)-C(11)-H(11) | 106.9      |
| C(1)-C(11)-H(11)  | 106.9      |
| C(10)-C(11)-H(11) | 106.9      |
| O(2)-C(12)-C(13)  | 120.68(12) |
| O(2)-C(12)-C(11)  | 120.22(12) |
| C(13)-C(12)-C(11) | 119.11(11) |
| C(14)-C(13)-C(18) | 119.41(14) |
| C(14)-C(13)-C(12) | 123.41(12) |
| C(18)-C(13)-C(12) | 117.14(13) |
| C(15)-C(14)-C(13) | 119.90(15) |
| C(15)-C(14)-H(14) | 120.1      |
| C(13)-C(14)-H(14) | 120.1      |
| C(16)-C(15)-C(14) | 120.01(18) |
| C(16)-C(15)-H(15) | 120.0      |
| C(14)-C(15)-H(15) | 120.0      |
| C(15)-C(16)-C(17) | 120.36(16) |
| C(15)-C(16)-H(16) | 119.8      |
| C(17)-C(16)-H(16) | 119.8      |
| C(18)-C(17)-C(16) | 120.18(16) |
| C(18)-C(17)-H(17) | 119.9      |
| C(16)-C(17)-H(17) | 119.9      |
| C(17)-C(18)-C(13) | 120.15(17) |
| C(17)-C(18)-H(18) | 119.9      |
| C(13)-C(18)-H(18) | 119.9      |
| C(25)-C(19)-C(24) | 118.54(14) |

|                   |            |
|-------------------|------------|
| C(25)-C(19)-H(19) | 120.7      |
| C(24)-C(19)-H(19) | 120.7      |
| O(3)-C(20)-N(2)   | 125.68(12) |
| O(3)-C(20)-C(10)  | 126.71(11) |
| N(2)-C(20)-C(10)  | 107.58(10) |
| C(22)-C(21)-C(25) | 122.09(14) |
| C(22)-C(21)-N(2)  | 128.41(14) |
| C(25)-C(21)-N(2)  | 109.49(12) |
| C(21)-C(22)-C(23) | 117.58(16) |
| C(21)-C(22)-H(22) | 121.2      |
| C(23)-C(22)-H(22) | 121.2      |
| C(24)-C(23)-C(22) | 121.22(16) |
| C(24)-C(23)-H(23) | 119.4      |
| C(22)-C(23)-H(23) | 119.4      |
| C(23)-C(24)-C(19) | 121.02(16) |
| C(23)-C(24)-H(24) | 119.5      |
| C(19)-C(24)-H(24) | 119.5      |
| C(19)-C(25)-C(21) | 119.54(12) |
| C(19)-C(25)-C(10) | 131.51(12) |
| C(21)-C(25)-C(10) | 108.92(11) |
| C(31)-C(26)-C(27) | 118.61(12) |
| C(31)-C(26)-C(9)  | 119.32(11) |
| C(27)-C(26)-C(9)  | 122.01(11) |
| C(28)-C(27)-C(26) | 120.96(13) |
| C(28)-C(27)-H(27) | 119.5      |
| C(26)-C(27)-H(27) | 119.5      |
| C(29)-C(28)-C(27) | 118.09(13) |
| C(29)-C(28)-H(28) | 121.0      |
| C(27)-C(28)-H(28) | 121.0      |
| C(30)-C(29)-C(28) | 123.18(13) |
| C(30)-C(29)-F(1)  | 118.55(14) |
| C(28)-C(29)-F(1)  | 118.27(14) |
| C(29)-C(30)-C(31) | 118.16(14) |
| C(29)-C(30)-H(30) | 120.9      |
| C(31)-C(30)-H(30) | 120.9      |

|                     |            |
|---------------------|------------|
| C(26)-C(31)-C(30)   | 120.98(13) |
| C(26)-C(31)-H(31)   | 119.5      |
| C(30)-C(31)-H(31)   | 119.5      |
| O(4)-C(33)-H(33A)   | 109.5      |
| O(4)-C(33)-H(33B)   | 109.5      |
| H(33A)-C(33)-H(33B) | 109.5      |
| O(4)-C(33)-H(33C)   | 109.5      |
| H(33A)-C(33)-H(33C) | 109.5      |
| H(33B)-C(33)-H(33C) | 109.5      |
| C(2)-N(1)-C(3)      | 111.82(10) |
| C(2)-N(1)-H(1N)     | 121.4(11)  |
| C(3)-N(1)-H(1N)     | 125.9(11)  |
| C(20)-N(2)-C(21)    | 111.82(11) |
| C(20)-N(2)-H(2N)    | 124.6(12)  |
| C(21)-N(2)-H(2N)    | 122.3(12)  |
| C(1)-N(3)-C(9)      | 106.07(9)  |
| C(1)-N(3)-H(3N)     | 111.0(11)  |
| C(9)-N(3)-H(3N)     | 110.4(11)  |
| C(6)-O(4)-C(33)     | 118.41(12) |

---

Symmetry transformations used to generate equivalent atoms:

Table 4. Anisotropic displacement parameters ( $\text{\AA}^2 \times 10^3$ ) for **4s**. The anisotropic displacement factor exponent takes the form:  $-2\pi^2 [ h^2 a^{*2} U^{11} + \dots + 2 h k a^* b^* U^{12} ]$

|       | U <sup>11</sup> | U <sup>22</sup> | U <sup>33</sup> | U <sup>23</sup> | U <sup>13</sup> | U <sup>12</sup> |
|-------|-----------------|-----------------|-----------------|-----------------|-----------------|-----------------|
| C(1)  | 30(1)           | 38(1)           | 36(1)           | -1(1)           | -13(1)          | 1(1)            |
| C(2)  | 33(1)           | 42(1)           | 43(1)           | -2(1)           | -14(1)          | 2(1)            |
| C(3)  | 35(1)           | 39(1)           | 39(1)           | -7(1)           | -13(1)          | -1(1)           |
| C(4)  | 38(1)           | 47(1)           | 42(1)           | -10(1)          | -8(1)           | 1(1)            |
| C(5)  | 52(1)           | 50(1)           | 35(1)           | -7(1)           | -5(1)           | -2(1)           |
| C(6)  | 57(1)           | 43(1)           | 35(1)           | -4(1)           | -15(1)          | 4(1)            |
| C(7)  | 44(1)           | 44(1)           | 36(1)           | -6(1)           | -13(1)          | 6(1)            |
| C(8)  | 34(1)           | 38(1)           | 34(1)           | -6(1)           | -11(1)          | -1(1)           |
| C(9)  | 31(1)           | 39(1)           | 40(1)           | 2(1)            | -13(1)          | -1(1)           |
| C(10) | 29(1)           | 43(1)           | 33(1)           | 1(1)            | -11(1)          | 0(1)            |
| C(11) | 31(1)           | 39(1)           | 31(1)           | -1(1)           | -11(1)          | -1(1)           |
| C(12) | 36(1)           | 52(1)           | 32(1)           | 0(1)            | -11(1)          | -8(1)           |
| C(13) | 50(1)           | 52(1)           | 30(1)           | 2(1)            | -13(1)          | -17(1)          |
| C(14) | 64(1)           | 51(1)           | 42(1)           | 0(1)            | -22(1)          | -12(1)          |
| C(15) | 93(1)           | 50(1)           | 48(1)           | 0(1)            | -24(1)          | -12(1)          |
| C(16) | 112(2)          | 60(1)           | 51(1)           | -3(1)           | -25(1)          | -37(1)          |
| C(17) | 87(1)           | 79(1)           | 54(1)           | -2(1)           | -28(1)          | -41(1)          |
| C(18) | 60(1)           | 71(1)           | 43(1)           | 0(1)            | -20(1)          | -25(1)          |
| C(19) | 39(1)           | 83(1)           | 39(1)           | 4(1)            | -14(1)          | 7(1)            |
| C(20) | 34(1)           | 41(1)           | 40(1)           | -1(1)           | -11(1)          | 0(1)            |
| C(21) | 47(1)           | 68(1)           | 36(1)           | -3(1)           | -12(1)          | 5(1)            |
| C(22) | 75(1)           | 119(2)          | 39(1)           | -17(1)          | -16(1)          | 24(1)           |
| C(23) | 76(1)           | 157(2)          | 37(1)           | -11(1)          | -24(1)          | 21(1)           |
| C(24) | 55(1)           | 132(2)          | 41(1)           | 7(1)            | -22(1)          | 13(1)           |
| C(25) | 34(1)           | 55(1)           | 33(1)           | 2(1)            | -10(1)          | -3(1)           |
| C(26) | 32(1)           | 39(1)           | 45(1)           | 0(1)            | -13(1)          | -3(1)           |
| C(27) | 41(1)           | 57(1)           | 53(1)           | 9(1)            | -21(1)          | -9(1)           |
| C(28) | 41(1)           | 56(1)           | 74(1)           | -1(1)           | -29(1)          | -3(1)           |
| C(29) | 31(1)           | 49(1)           | 68(1)           | -12(1)          | -9(1)           | -4(1)           |
| C(30) | 44(1)           | 64(1)           | 54(1)           | 7(1)            | -7(1)           | -13(1)          |

|       |        |       |        |        |        |       |
|-------|--------|-------|--------|--------|--------|-------|
| C(31) | 41(1)  | 57(1) | 51(1)  | 9(1)   | -16(1) | -7(1) |
| C(33) | 106(2) | 84(1) | 36(1)  | 4(1)   | -16(1) | 17(1) |
| F(1)  | 31(1)  | 77(1) | 103(1) | -13(1) | -8(1)  | -8(1) |
| N(1)  | 32(1)  | 47(1) | 42(1)  | -4(1)  | -11(1) | 7(1)  |
| N(2)  | 49(1)  | 63(1) | 40(1)  | -8(1)  | -12(1) | 18(1) |
| N(3)  | 32(1)  | 42(1) | 41(1)  | -6(1)  | -11(1) | -3(1) |
| O(1)  | 39(1)  | 56(1) | 49(1)  | 11(1)  | -13(1) | 6(1)  |
| O(2)  | 38(1)  | 72(1) | 69(1)  | -16(1) | -24(1) | 1(1)  |
| O(3)  | 47(1)  | 50(1) | 48(1)  | 0(1)   | -22(1) | 7(1)  |
| O(4)  | 85(1)  | 65(1) | 34(1)  | 0(1)   | -14(1) | 22(1) |

---

Table 5. Hydrogen coordinates ( $\times 10^4$ ) and isotropic displacement parameters ( $\text{\AA}^2 \times 10^3$ ) for **4s**.

|        | x         | y        | z         | U(eq) |
|--------|-----------|----------|-----------|-------|
| H(4)   | 11086     | 1317     | -3519     | 54    |
| H(5)   | 10443     | 2703     | -4813     | 59    |
| H(7)   | 6774      | 3495     | -2095     | 51    |
| H(9)   | 5760      | 765      | 1687      | 46    |
| H(11)  | 6525      | 3662     | 111       | 41    |
| H(14)  | 6128      | 5313     | 969       | 62    |
| H(15)  | 6041      | 7223     | 1576      | 78    |
| H(16)  | 7741      | 7702     | 2102      | 88    |
| H(17)  | 9503      | 6273     | 2075      | 84    |
| H(18)  | 9589      | 4363     | 1506      | 68    |
| H(19)  | 7336      | 1291     | 2795      | 67    |
| H(22)  | 3852      | 3852     | 5444      | 99    |
| H(23)  | 5395      | 2663     | 6089      | 111   |
| H(24)  | 7096      | 1403     | 4796      | 94    |
| H(27)  | 3358      | 2130     | 496       | 60    |
| H(28)  | 1031      | 1949     | 1358      | 66    |
| H(30)  | 1430      | 135      | 4250      | 70    |
| H(31)  | 3758      | 309      | 3385      | 61    |
| H(33A) | 9743      | 4332     | -5760     | 124   |
| H(33B) | 8374      | 4692     | -5937     | 124   |
| H(33C) | 8918      | 3334     | -5860     | 124   |
| H(1N)  | 10217(18) | 396(14)  | -1144(15) | 54(4) |
| H(2N)  | 3280(20)  | 4488(17) | 3464(17)  | 70(5) |
| H(3N)  | 6053(17)  | 720(16)  | -250(16)  | 60(5) |

Table 6. Torsion angles [°] for **4s**..

---

|                        |             |
|------------------------|-------------|
| N(3)-C(1)-C(2)-O(1)    | -50.53(17)  |
| C(8)-C(1)-C(2)-O(1)    | -173.98(13) |
| C(11)-C(1)-C(2)-O(1)   | 63.87(17)   |
| N(3)-C(1)-C(2)-N(1)    | 124.93(11)  |
| C(8)-C(1)-C(2)-N(1)    | 1.48(13)    |
| C(11)-C(1)-C(2)-N(1)   | -120.68(11) |
| C(8)-C(3)-C(4)-C(5)    | 0.14(19)    |
| N(1)-C(3)-C(4)-C(5)    | 179.28(13)  |
| C(3)-C(4)-C(5)-C(6)    | -0.2(2)     |
| C(4)-C(5)-C(6)-O(4)    | 178.49(13)  |
| C(4)-C(5)-C(6)-C(7)    | 0.1(2)      |
| O(4)-C(6)-C(7)-C(8)    | -178.57(12) |
| C(5)-C(6)-C(7)-C(8)    | -0.1(2)     |
| C(6)-C(7)-C(8)-C(3)    | 0.06(19)    |
| C(6)-C(7)-C(8)-C(1)    | 177.60(12)  |
| C(4)-C(3)-C(8)-C(7)    | -0.09(19)   |
| N(1)-C(3)-C(8)-C(7)    | -179.38(11) |
| C(4)-C(3)-C(8)-C(1)    | -178.11(11) |
| N(1)-C(3)-C(8)-C(1)    | 2.60(14)    |
| N(3)-C(1)-C(8)-C(7)    | 57.79(17)   |
| C(11)-C(1)-C(8)-C(7)   | -57.03(16)  |
| C(2)-C(1)-C(8)-C(7)    | 179.81(13)  |
| N(3)-C(1)-C(8)-C(3)    | -124.45(11) |
| C(11)-C(1)-C(8)-C(3)   | 120.73(10)  |
| C(2)-C(1)-C(8)-C(3)    | -2.43(12)   |
| N(3)-C(9)-C(10)-C(25)  | -148.79(9)  |
| C(26)-C(9)-C(10)-C(25) | 87.11(12)   |
| N(3)-C(9)-C(10)-C(20)  | 97.44(10)   |
| C(26)-C(9)-C(10)-C(20) | -26.66(14)  |
| N(3)-C(9)-C(10)-C(11)  | -20.00(10)  |
| C(26)-C(9)-C(10)-C(11) | -144.10(10) |
| N(3)-C(1)-C(11)-C(12)  | 159.74(9)   |
| C(8)-C(1)-C(11)-C(12)  | -77.07(12)  |

|                         |             |
|-------------------------|-------------|
| C(2)-C(1)-C(11)-C(12)   | 38.31(14)   |
| N(3)-C(1)-C(11)-C(10)   | 32.10(11)   |
| C(8)-C(1)-C(11)-C(10)   | 155.29(9)   |
| C(2)-C(1)-C(11)-C(10)   | -89.32(11)  |
| C(25)-C(10)-C(11)-C(12) | -11.17(15)  |
| C(20)-C(10)-C(11)-C(12) | 105.21(11)  |
| C(9)-C(10)-C(11)-C(12)  | -135.37(10) |
| C(25)-C(10)-C(11)-C(1)  | 116.71(11)  |
| C(20)-C(10)-C(11)-C(1)  | -126.91(10) |
| C(9)-C(10)-C(11)-C(1)   | -7.49(11)   |
| C(1)-C(11)-C(12)-O(2)   | -19.97(16)  |
| C(10)-C(11)-C(12)-O(2)  | 103.23(14)  |
| C(1)-C(11)-C(12)-C(13)  | 159.54(10)  |
| C(10)-C(11)-C(12)-C(13) | -77.26(13)  |
| O(2)-C(12)-C(13)-C(14)  | 170.52(13)  |
| C(11)-C(12)-C(13)-C(14) | -8.99(18)   |
| O(2)-C(12)-C(13)-C(18)  | -7.03(18)   |
| C(11)-C(12)-C(13)-C(18) | 173.47(11)  |
| C(18)-C(13)-C(14)-C(15) | -0.6(2)     |
| C(12)-C(13)-C(14)-C(15) | -178.07(13) |
| C(13)-C(14)-C(15)-C(16) | 1.0(2)      |
| C(14)-C(15)-C(16)-C(17) | -0.8(3)     |
| C(15)-C(16)-C(17)-C(18) | 0.2(3)      |
| C(16)-C(17)-C(18)-C(13) | 0.2(2)      |
| C(14)-C(13)-C(18)-C(17) | 0.0(2)      |
| C(12)-C(13)-C(18)-C(17) | 177.66(13)  |
| C(25)-C(10)-C(20)-O(3)  | 172.12(13)  |
| C(11)-C(10)-C(20)-O(3)  | 45.26(17)   |
| C(9)-C(10)-C(20)-O(3)   | -68.01(16)  |
| C(25)-C(10)-C(20)-N(2)  | -6.12(13)   |
| C(11)-C(10)-C(20)-N(2)  | -132.99(11) |
| C(9)-C(10)-C(20)-N(2)   | 113.74(12)  |
| C(25)-C(21)-C(22)-C(23) | -0.4(3)     |
| N(2)-C(21)-C(22)-C(23)  | -179.9(2)   |
| C(21)-C(22)-C(23)-C(24) | -0.3(4)     |



|                         |             |
|-------------------------|-------------|
| C(22)-C(23)-C(24)-C(19) | 0.4(4)      |
| C(25)-C(19)-C(24)-C(23) | 0.4(3)      |
| C(24)-C(19)-C(25)-C(21) | -1.1(2)     |
| C(24)-C(19)-C(25)-C(10) | -178.74(16) |
| C(22)-C(21)-C(25)-C(19) | 1.1(3)      |
| N(2)-C(21)-C(25)-C(19)  | -179.29(14) |
| C(22)-C(21)-C(25)-C(10) | 179.28(17)  |
| N(2)-C(21)-C(25)-C(10)  | -1.15(17)   |
| C(20)-C(10)-C(25)-C(19) | -177.84(15) |
| C(11)-C(10)-C(25)-C(19) | -57.5(2)    |
| C(9)-C(10)-C(25)-C(19)  | 62.06(18)   |
| C(20)-C(10)-C(25)-C(21) | 4.33(14)    |
| C(11)-C(10)-C(25)-C(21) | 124.69(13)  |
| C(9)-C(10)-C(25)-C(21)  | -115.78(12) |
| N(3)-C(9)-C(26)-C(31)   | 148.97(12)  |
| C(10)-C(9)-C(26)-C(31)  | -92.44(14)  |
| N(3)-C(9)-C(26)-C(27)   | -33.75(17)  |
| C(10)-C(9)-C(26)-C(27)  | 84.84(15)   |
| C(31)-C(26)-C(27)-C(28) | 1.6(2)      |
| C(9)-C(26)-C(27)-C(28)  | -175.72(13) |
| C(26)-C(27)-C(28)-C(29) | -0.1(2)     |
| C(27)-C(28)-C(29)-C(30) | -1.5(2)     |
| C(27)-C(28)-C(29)-F(1)  | 178.66(13)  |
| C(28)-C(29)-C(30)-C(31) | 1.3(2)      |
| F(1)-C(29)-C(30)-C(31)  | -178.78(14) |
| C(27)-C(26)-C(31)-C(30) | -1.7(2)     |
| C(9)-C(26)-C(31)-C(30)  | 175.67(13)  |
| C(29)-C(30)-C(31)-C(26) | 0.3(2)      |
| O(1)-C(2)-N(1)-C(3)     | 175.43(13)  |
| C(1)-C(2)-N(1)-C(3)     | -0.02(14)   |
| C(4)-C(3)-N(1)-C(2)     | 179.15(13)  |
| C(8)-C(3)-N(1)-C(2)     | -1.63(15)   |
| O(3)-C(20)-N(2)-C(21)   | -172.33(14) |
| C(10)-C(20)-N(2)-C(21)  | 5.94(16)    |
| C(22)-C(21)-N(2)-C(20)  | 176.38(19)  |

|                        |             |
|------------------------|-------------|
| C(25)-C(21)-N(2)-C(20) | -3.15(19)   |
| C(8)-C(1)-N(3)-C(9)    | -168.78(9)  |
| C(11)-C(1)-N(3)-C(9)   | -46.85(11)  |
| C(2)-C(1)-N(3)-C(9)    | 75.78(12)   |
| C(26)-C(9)-N(3)-C(1)   | 167.83(10)  |
| C(10)-C(9)-N(3)-C(1)   | 42.72(11)   |
| C(5)-C(6)-O(4)-C(33)   | 15.4(2)     |
| C(7)-C(6)-O(4)-C(33)   | -166.14(17) |

---

Symmetry transformations used to generate equivalent atoms:

Table 7. Hydrogen bonds for **4s** [ $\text{\AA}$  and  $^\circ$ ].

| D-H...A             | d(D-H)    | d(H...A)  | d(D...A)   | $\angle(\text{DHA})$ |
|---------------------|-----------|-----------|------------|----------------------|
| N(2)-H(2N)...O(4)#1 | 0.88(2)   | 2.07(2)   | 2.9467(16) | 176.4(18)            |
| N(1)-H(1N)...O(1)#2 | 0.879(17) | 1.960(17) | 2.8215(14) | 166.2(15)            |

Symmetry transformations used to generate equivalent atoms:

#1  $-x+1, -y+1, -z$  #2  $-x+2, -y, -z$
